# Supplementary material for: Antiproliferative Activity of Euphorbia ingens Extract against Prostate Cancer Cell Line: An in silico and in vitro Analysis
Source: Preprints.org preprint supplement (doi:10.20944/preprints202305.1881.v1), 2023-05-26
Supplement: Supplementary file 1 [file supplementary]

## Sheet: C0600139
			Table S4: Prostate cancer targets
DisGeNet
Disease	Gene	UniProt	Gene_Full_Name	Protein_Class
Prostate carcinoma	IGF1R	P08069	insulin like growth factor 1 receptor	Kinase
Prostate carcinoma	MMP7	P09237	matrix metallopeptidase 7	Enzyme
Prostate carcinoma	MKI67	P46013	marker of proliferation Ki-67
Prostate carcinoma	PCAT1		prostate cancer associated transcript 1
Prostate carcinoma	CDKN1B	P46527	cyclin dependent kinase inhibitor 1B
Prostate carcinoma	HOXB13	Q92826	homeobox B13
Prostate carcinoma	ESR2	Q92731	estrogen receptor 2	Nuclear receptor
Prostate carcinoma	FGFR2	P21802	fibroblast growth factor receptor 2	Kinase
Prostate carcinoma	KLK3	P07288	kallikrein related peptidase 3	Enzyme
Prostate carcinoma	MSMB	P08118	microseminoprotein beta	Signaling
Prostate carcinoma	ATM	Q13315	ATM serine/threonine kinase	Kinase
Prostate carcinoma	BCL2	P10415	BCL2 apoptosis regulator	Signaling
Prostate carcinoma	BRCA2	P51587	BRCA2 DNA repair associated	Nucleic acid binding
Prostate carcinoma	HNF1B	P35680	HNF1 homeobox B	Nucleic acid binding
Prostate carcinoma	CASP6	P55212	caspase 6	Enzyme
Prostate carcinoma	CASP8	Q14790	caspase 8	Enzyme
Prostate carcinoma	JAZF1	Q86VZ6	JAZF zinc finger 1
Prostate carcinoma	MDM4	O15151	MDM4 regulator of p53	Nucleic acid binding
Prostate carcinoma	PRNCR1		prostate cancer associated non-coding RNA 1
Prostate carcinoma	MYO6	Q9UM54	myosin VI	Cellular structure
Prostate carcinoma	SLC22A3	O75751	solute carrier family 22 member 3	Transporter
Prostate carcinoma	CTBP2	P56545	C-terminal binding protein 2	Transcription factor
Prostate carcinoma	RFX6	Q8HWS3	regulatory factor X6	Transcription factor
Prostate carcinoma	FHIT	P49789	fragile histidine triad diadenosine triphosphatase
Prostate carcinoma	TCF7L2	Q9NQB0	transcription factor 7 like 2
Prostate carcinoma	POU5F1B	Q06416	POU class 5 homeobox 1B
Prostate carcinoma	RASA1	P20936	RAS p21 protein activator 1	Enzyme modulator
Prostate carcinoma	LDAH	Q9H6V9	lipid droplet associated hydrolase
Prostate carcinoma	CDKN2B-AS1		CDKN2B antisense RNA 1
Prostate carcinoma	SPINT2	O43291	serine peptidase inhibitor, Kunitz type 2
Prostate carcinoma	FOXP4	Q8IVH2	forkhead box P4
Prostate carcinoma	LMTK2	Q8IWU2	lemur tyrosine kinase 2	Kinase
Prostate carcinoma	PDLIM5	Q96HC4	PDZ and LIM domain 5	Cellular structure
Prostate carcinoma	PHLPP2	Q6ZVD8	PH domain and leucine rich repeat protein phosphatase 2
Prostate carcinoma	RGS17	Q9UGC6	regulator of G protein signaling 17	Enzyme modulator
Prostate carcinoma	KRT8	P05787	keratin 8
Prostate carcinoma	PRKCI	P41743	protein kinase C iota	Kinase
Prostate carcinoma	MAP2K1	Q02750	mitogen-activated protein kinase kinase 1	Kinase
Prostate carcinoma	EMSY	Q7Z589	EMSY transcriptional repressor, BRCA2 interacting
Prostate carcinoma	PCAT19		prostate cancer associated transcript 19
Prostate carcinoma	MARCHF8	Q5T0T0	membrane associated ring-CH-type finger 8
Prostate carcinoma	ZNF652	Q9Y2D9	zinc finger protein 652	Transcription factor
Prostate carcinoma	EHBP1	Q8NDI1	EH domain binding protein 1
Prostate carcinoma	FSHR	P23945	follicle stimulating hormone receptor	G-protein coupled receptor
Prostate carcinoma	SUN2	Q9UH99	Sad1 and UNC84 domain containing 2	Cellular structure
Prostate carcinoma	HLA-B	P01889	major histocompatibility complex, class I, B
Prostate carcinoma	NEDD9	Q14511	neural precursor cell expressed, developmentally down-regulated 9
Prostate carcinoma	RAD51B	O15315	RAD51 paralog B
Prostate carcinoma	TCF4	P15884	transcription factor 4	Transcription factor
Prostate carcinoma	MLPH	Q9BV36	melanophilin	Cellular structure
Prostate carcinoma	PPFIBP2	Q8ND30	PPFIA binding protein 2
Prostate carcinoma	TSPOAP1-AS1		TSPOAP1, SUPT4H1 and RNF43 antisense RNA 1
Prostate carcinoma	CCAT2		colon cancer associated transcript 2
Prostate carcinoma	DNAH5	Q8TE73	dynein axonemal heavy chain 5	Enzyme
Prostate carcinoma	DNM2	P50570	dynamin 2	Enzyme modulator
Prostate carcinoma	FGF10	O15520	fibroblast growth factor 10	Signaling
Prostate carcinoma	TNRC6B	Q9UPQ9	trinucleotide repeat containing adaptor 6B
Prostate carcinoma	LARP4B	Q92615	La ribonucleoprotein 4B	Nucleic acid binding
Prostate carcinoma	NAALADL2	Q58DX5	N-acetylated alpha-linked acidic dipeptidase like 2	Enzyme
Prostate carcinoma	GSR	P00390	glutathione-disulfide reductase	Enzyme
Prostate carcinoma	INCENP	Q9NQS7	inner centromere protein
Prostate carcinoma	LAMB1	P07942	laminin subunit beta 1	Enzyme modulator
Prostate carcinoma	LRP1B	Q9NZR2	LDL receptor related protein 1B
Prostate carcinoma	MIR4435-2HG		MIR4435-2 host gene
Prostate carcinoma	RPGR	Q92834	retinitis pigmentosa GTPase regulator
Prostate carcinoma	THADA	Q6YHU6	THADA armadillo repeat containing	Receptor
Prostate carcinoma	SIX1	Q15475	SIX homeobox 1	Transcription factor
Prostate carcinoma	ZGPAT	Q8N5A5	zinc finger CCCH-type and G-patch domain containing
Prostate carcinoma	ADGRG1	Q9Y653	adhesion G protein-coupled receptor G1	G-protein coupled receptor
Prostate carcinoma	NAT2	P11245	N-acetyltransferase 2	Enzyme
Prostate carcinoma	CD24	P25063	CD24 molecule
Prostate carcinoma	BCL2L11	O43521	BCL2 like 11
Prostate carcinoma	SH2B3	Q9UQQ2	SH2B adaptor protein 3
Prostate carcinoma	TMED7-TICAM2	Q86XR7;Q9Y3B3	TMED7-TICAM2 readthrough
Prostate carcinoma	FRY	Q5TBA9	FRY microtubule binding protein
Prostate carcinoma	GATA2-AS1		GATA2 antisense RNA 1
Prostate carcinoma	PKN2-AS1		PKN2 antisense RNA 1
Prostate carcinoma	CDKN1A	P38936	cyclin dependent kinase inhibitor 1A
Prostate carcinoma	LINC01169		long intergenic non-protein coding RNA 1169
Prostate carcinoma	LINC01496		long intergenic non-protein coding RNA 1496
Prostate carcinoma	CDKN2A	P42771;Q8N726	cyclin dependent kinase inhibitor 2A
Prostate carcinoma	CASC19		cancer susceptibility 19
Prostate carcinoma	CRISP3	P54108	cysteine rich secretory protein 3	Immune response
Prostate carcinoma	NDRG1	Q92597	N-myc downstream regulated 1	Enzyme
Prostate carcinoma	YAP1	P46937	Yes associated protein 1	Enzyme modulator
Prostate carcinoma	VAV3	Q9UKW4	vav guanine nucleotide exchange factor 3
Prostate carcinoma	CIB1	Q99828	calcium and integrin binding 1
Prostate carcinoma	ZNRD2	O60232	zinc ribbon domain containing 2
Prostate carcinoma	AGR2	O95994	anterior gradient 2, protein disulphide isomerase family member	Enzyme
Prostate carcinoma	AHSA1	O95433	activator of HSP90 ATPase activity 1
Prostate carcinoma	KHDRBS1	Q07666	KH RNA binding domain containing, signal transduction associated 1	Nucleic acid binding
Prostate carcinoma	CXCR6	O00574	C-X-C motif chemokine receptor 6	G-protein coupled receptor
Prostate carcinoma	DCTN6	O00399	dynactin subunit 6	Cellular structure
Prostate carcinoma	MTCO2P12		MT-CO2 pseudogene 12
Prostate carcinoma	LINC02055		long intergenic non-protein coding RNA 2055
Prostate carcinoma	FERMT2	Q96AC1	fermitin family member 2
Prostate carcinoma	IL24	Q13007	interleukin 24
Prostate carcinoma	GLIPR1	P48060	GLI pathogenesis related 1	Immune response
Prostate carcinoma	CHD1	O14646	chromodomain helicase DNA binding protein 1
Prostate carcinoma	CHD3	Q12873	chromodomain helicase DNA binding protein 3
Prostate carcinoma	TRIM31	Q9BZY9	tripartite motif containing 31
Prostate carcinoma	CHGA	P10645	chromogranin A
Prostate carcinoma	RASSF1	Q9NS23	Ras association domain family member 1	Enzyme modulator
Prostate carcinoma	CHEK2	O96017	checkpoint kinase 2	Kinase
Prostate carcinoma	SLC52A3	Q9NQ40	solute carrier family 52 member 3	Transporter
Prostate carcinoma	FAM83F	Q8NEG4	family with sequence similarity 83 member F
Prostate carcinoma	H3P23		H3 histone pseudogene 23
Prostate carcinoma	H3P10		H3 histone pseudogene 10
Prostate carcinoma	C10orf90	Q96M02	chromosome 10 open reading frame 90
Prostate carcinoma	CLU	P10909	clusterin
Prostate carcinoma	COL11A2	P13942	collagen type XI alpha 2 chain
Prostate carcinoma	COMT	P21964	catechol-O-methyltransferase	Enzyme
Prostate carcinoma	KLF6	Q99612	Kruppel like factor 6	Nucleic acid binding
Prostate carcinoma	SLCO6A1	Q86UG4	solute carrier organic anion transporter family member 6A1	Transporter
Prostate carcinoma	CREBBP	Q92793	CREB binding protein
Prostate carcinoma	DGKK	Q5KSL6	diacylglycerol kinase kappa	Enzyme
Prostate carcinoma	CRK	P46108	CRK proto-oncogene, adaptor protein
Prostate carcinoma	CRP	P02741	C-reactive protein
Prostate carcinoma	PARP1	P09874	poly(ADP-ribose) polymerase 1
Prostate carcinoma	MAPK14	Q16539	mitogen-activated protein kinase 14	Kinase
Prostate carcinoma	CSF2	P04141	colony stimulating factor 2	Signaling
Prostate carcinoma	ADRA1A	P35348	adrenoceptor alpha 1A	G-protein coupled receptor
Prostate carcinoma	CTAG1B	P78358	cancer/testis antigen 1B
Prostate carcinoma	CTNNB1	P35222	catenin beta 1
Prostate carcinoma	CTSB	P07858	cathepsin B	Enzyme
Prostate carcinoma	ADRA2B	P18089	adrenoceptor alpha 2B	G-protein coupled receptor
Prostate carcinoma	GDF7	Q7Z4P5	growth differentiation factor 7	Signaling
Prostate carcinoma	NEK10	Q6ZWH5	NIMA related kinase 10	Kinase
Prostate carcinoma	DAB2IP	Q5VWQ8	DAB2 interacting protein	Enzyme modulator
Prostate carcinoma	CYP1A1	P04798	cytochrome P450 family 1 subfamily A member 1	Enzyme
Prostate carcinoma	CYP1B1	Q16678	cytochrome P450 family 1 subfamily B member 1	Enzyme
Prostate carcinoma	CYP3A4	P08684	cytochrome P450 family 3 subfamily A member 4	Enzyme
Prostate carcinoma	CBLL2	Q8N7E2	Cbl proto-oncogene like 2	Enzyme
Prostate carcinoma	CYP17A1	P05093	cytochrome P450 family 17 subfamily A member 1
Prostate carcinoma	CYP19A1	P11511	cytochrome P450 family 19 subfamily A member 1	Enzyme
Prostate carcinoma	CYP24A1	Q07973	cytochrome P450 family 24 subfamily A member 1	Enzyme
Prostate carcinoma	CYP27B1	O15528	cytochrome P450 family 27 subfamily B member 1	Enzyme
Prostate carcinoma	ACE	P12821	angiotensin I converting enzyme	Enzyme
Prostate carcinoma	SPATA5	Q8NB90	spermatogenesis associated 5
Prostate carcinoma	XAGE3	Q8WTP9	X antigen family member 3
Prostate carcinoma	DHCR24	Q15392	24-dehydrocholesterol reductase	Enzyme
Prostate carcinoma	AFM	P43652	afamin	Transporter
Prostate carcinoma	DNMT1	P26358	DNA methyltransferase 1	Epigenetic regulator
Prostate carcinoma	DOCK2	Q92608	dedicator of cytokinesis 2
Prostate carcinoma	DPT	Q07507	dermatopontin	Extracellular structure
Prostate carcinoma	TOR1A	O14656	torsin family 1 member A	Chaperone
Prostate carcinoma	E2F1	Q01094	E2F transcription factor 1	Nucleic acid binding
Prostate carcinoma	EDNRA	P25101	endothelin receptor type A	G-protein coupled receptor
Prostate carcinoma	EGF	P01133	epidermal growth factor
Prostate carcinoma	EGFR	P00533	epidermal growth factor receptor	Kinase
Prostate carcinoma	EGR1	P18146	early growth response 1	Nucleic acid binding
Prostate carcinoma	AHR	P35869	aryl hydrocarbon receptor	Transcription factor
Prostate carcinoma	PLPP4	Q5VZY2	phospholipid phosphatase 4	Enzyme
Prostate carcinoma	RMST		rhabdomyosarcoma 2 associated transcript
Prostate carcinoma	EIF4E	P06730	eukaryotic translation initiation factor 4E	Nucleic acid binding
Prostate carcinoma	ELAVL2	Q12926	ELAV like RNA binding protein 2
Prostate carcinoma	EN2	P19622	engrailed homeobox 2	Transcription factor
Prostate carcinoma	EPHB2	P29323	EPH receptor B2	Kinase
Prostate carcinoma	ERBB2	P04626	erb-b2 receptor tyrosine kinase 2	Kinase
Prostate carcinoma	ERCC2	P18074	ERCC excision repair 2, TFIIH core complex helicase subunit	Enzyme
Prostate carcinoma	AKT1	P31749	AKT serine/threonine kinase 1	Kinase
Prostate carcinoma	ERG	P11308	ETS transcription factor ERG	Transcription factor
Prostate carcinoma	ESR1	P03372	estrogen receptor 1	Nuclear receptor
Prostate carcinoma	ETV1	P50549	ETS variant transcription factor 1	Transcription factor
Prostate carcinoma	ETV4	P43268	ETS variant transcription factor 4	Transcription factor
Prostate carcinoma	MECOM	Q03112	MDS1 and EVI1 complex locus
Prostate carcinoma	EZH2	Q15910	enhancer of zeste 2 polycomb repressive complex 2 subunit	Epigenetic regulator
Prostate carcinoma	PTK2B	Q14289	protein tyrosine kinase 2 beta	Kinase
Prostate carcinoma	FASN	P49327	fatty acid synthase	Enzyme
Prostate carcinoma	GPRC6A	Q5T6X5	G protein-coupled receptor class C group 6 member A	G-protein coupled receptor
Prostate carcinoma	FGF2	P09038	fibroblast growth factor 2	Signaling
Prostate carcinoma	FGF8	P55075	fibroblast growth factor 8	Signaling
Prostate carcinoma	FGFR1	P11362	fibroblast growth factor receptor 1	Kinase
Prostate carcinoma	FGFR4	P22455	fibroblast growth factor receptor 4	Kinase
Prostate carcinoma	RALY	Q9UKM9	RALY heterogeneous nuclear ribonucleoprotein
Prostate carcinoma	KDM2A	Q9Y2K7	lysine demethylase 2A
Prostate carcinoma	FOXM1	Q08050	forkhead box M1
Prostate carcinoma	FOXO1	Q12778	forkhead box O1
Prostate carcinoma	FOXO3	O43524	forkhead box O3
Prostate carcinoma	TBC1D9	Q6ZT07	TBC1 domain family member 9	Enzyme
Prostate carcinoma	CAMTA1	Q9Y6Y1	calmodulin binding transcription activator 1	Transcription factor
Prostate carcinoma	TTC28	Q96AY4	tetratricopeptide repeat domain 28	Receptor
Prostate carcinoma	FN1	P02751	fibronectin 1	Signaling
Prostate carcinoma	ADNP	Q9H2P0	activity dependent neuroprotector homeobox
Prostate carcinoma	SIRT1	Q96EB6	sirtuin 1	Epigenetic regulator
Prostate carcinoma	FOLH1	Q04609	folate hydrolase 1	Enzyme
Prostate carcinoma	TRAM1	Q15629	translocation associated membrane protein 1
Prostate carcinoma	BRD4	O60885	bromodomain containing 4	Epigenetic regulator
Prostate carcinoma	FOS	P01100	Fos proto-oncogene, AP-1 transcription factor subunit	Transcription factor
Prostate carcinoma	FOSB	P53539	FosB proto-oncogene, AP-1 transcription factor subunit	Transcription factor
Prostate carcinoma	AMACR	Q9UHK6	alpha-methylacyl-CoA racemase
Prostate carcinoma	ALOX12	P18054	arachidonate 12-lipoxygenase, 12S type	Enzyme
Prostate carcinoma	ALOX15	P16050	arachidonate 15-lipoxygenase	Enzyme
Prostate carcinoma	CTAG1A	P78358	cancer/testis antigen 1A
Prostate carcinoma	MTOR	P42345	mechanistic target of rapamycin kinase	Kinase
Prostate carcinoma	ZBTB38	Q8NAP3	zinc finger and BTB domain containing 38	Transcription factor
Prostate carcinoma	GABPA	Q06546	GA binding protein transcription factor subunit alpha	Transcription factor
Prostate carcinoma	GABRG3	Q99928	gamma-aminobutyric acid type A receptor subunit gamma3	Ion channel
Prostate carcinoma	SPDEF	O95238	SAM pointed domain containing ETS transcription factor	Transcription factor
Prostate carcinoma	ARIH1	Q9Y4X5	ariadne RBR E3 ubiquitin protein ligase 1	Enzyme
Prostate carcinoma	PART1		prostate androgen-regulated transcript 1
Prostate carcinoma	RNF19A	Q9NV58	ring finger protein 19A, RBR E3 ubiquitin protein ligase	Enzyme
Prostate carcinoma	SNED1	Q8TER0	sushi, nidogen and EGF like domains 1
Prostate carcinoma	POLDIP2	Q9Y2S7	DNA polymerase delta interacting protein 2
Prostate carcinoma	GATA2	P23769	GATA binding protein 2
Prostate carcinoma	GATA3	P23771	GATA binding protein 3
Prostate carcinoma	GBAP1		glucosylceramidase beta pseudogene 1
Prostate carcinoma	STEAP1	Q9UHE8	STEAP family member 1
Prostate carcinoma	GHRH	P01286	growth hormone releasing hormone	Signaling
Prostate carcinoma	GJA1	P17302	gap junction protein alpha 1	Cell-cell junction
Prostate carcinoma	B3GAT1	Q9P2W7	beta-1,3-glucuronyltransferase 1	Enzyme
Prostate carcinoma	DKK3	Q9UBP4	dickkopf WNT signaling pathway inhibitor 3
Prostate carcinoma	HPGDS	O60760	hematopoietic prostaglandin D synthase
Prostate carcinoma	GLI1	P08151	GLI family zinc finger 1
Prostate carcinoma	GNRH1	P01148	gonadotropin releasing hormone 1
Prostate carcinoma	ZMIZ1-AS1		ZMIZ1 antisense RNA 1
Prostate carcinoma	RASSF3	Q86WH2	Ras association domain family member 3	Enzyme modulator
Prostate carcinoma	TTC28-AS1		TTC28 antisense RNA 1
Prostate carcinoma	GPR42	O15529	G protein-coupled receptor 42 (gene/pseudogene)	G-protein coupled receptor
Prostate carcinoma	GPX1	P07203	glutathione peroxidase 1	Enzyme
Prostate carcinoma	FLVCR1	Q9Y5Y0	FLVCR heme transporter 1	Transporter
Prostate carcinoma	SETD2	Q9BYW2	SET domain containing 2, histone lysine methyltransferase	Epigenetic regulator
Prostate carcinoma	NR3C1	P04150	nuclear receptor subfamily 3 group C member 1	Nuclear receptor
Prostate carcinoma	BABAM1	Q9NWV8	BRISC and BRCA1 A complex member 1
Prostate carcinoma	PYCARD	Q9ULZ3	PYD and CARD domain containing	Enzyme
Prostate carcinoma	CD274	Q9NZQ7	CD274 molecule	Receptor
Prostate carcinoma	GRP	P07492	gastrin releasing peptide
Prostate carcinoma	GRPR	P30550	gastrin releasing peptide receptor	G-protein coupled receptor
Prostate carcinoma	GSK3B	P49841	glycogen synthase kinase 3 beta	Kinase
Prostate carcinoma	GSTM1	P09488	glutathione S-transferase mu 1
Prostate carcinoma	GSTM2	P28161	glutathione S-transferase mu 2
Prostate carcinoma	GSTP1	P09211	glutathione S-transferase pi 1
Prostate carcinoma	GSTT1	P30711	glutathione S-transferase theta 1
Prostate carcinoma	MSH6	P52701	mutS homolog 6	Nucleic acid binding
Prostate carcinoma	GRHL1	Q9NZI5	grainyhead like transcription factor 1	Transcription factor
Prostate carcinoma	RMC1	Q96DM3	regulator of MON1-CCZ1
Prostate carcinoma	PSAT1	Q9Y617	phosphoserine aminotransferase 1
Prostate carcinoma	ANXA1	P04083	annexin A1
Prostate carcinoma	ANXA2	P07355	annexin A2
Prostate carcinoma	HDAC1	Q13547	histone deacetylase 1	Epigenetic regulator
Prostate carcinoma	HGF	P14210	hepatocyte growth factor	Enzyme
Prostate carcinoma	HIF1A	Q16665	hypoxia inducible factor 1 subunit alpha	Transcription factor
Prostate carcinoma	HMGB1	P09429	high mobility group box 1	Nucleic acid binding
Prostate carcinoma	HMOX1	P09601	heme oxygenase 1
Prostate carcinoma	FOXA1	P55317	forkhead box A1	Transcription factor
Prostate carcinoma	APC	P25054	APC regulator of WNT signaling pathway
Prostate carcinoma	HPN	P05981	hepsin	Enzyme
Prostate carcinoma	APEX1	P27695	apurinic/apyrimidinic endodeoxyribonuclease 1
Prostate carcinoma	HSD3B1	P14060	hydroxy-delta-5-steroid dehydrogenase, 3 beta- and steroid delta-isomerase 1	Enzyme
Prostate carcinoma	HSPA4	P34932	heat shock protein family A (Hsp70) member 4
Prostate carcinoma	HSPA5	P11021	heat shock protein family A (Hsp70) member 5
Prostate carcinoma	XIAP	P98170	X-linked inhibitor of apoptosis	Enzyme modulator
Prostate carcinoma	HSPB1	P04792	heat shock protein family B (small) member 1
Prostate carcinoma	HSPB2	Q16082	heat shock protein family B (small) member 2
Prostate carcinoma	HSP90AA1	P07900	heat shock protein 90 alpha family class A member 1	Chaperone
Prostate carcinoma	LINC00299	Q6ZSB3	long intergenic non-protein coding RNA 299
Prostate carcinoma	PKD1L3	Q7Z443	polycystin 1 like 3, transient receptor potential channel interacting
Prostate carcinoma	IFI27	P40305	interferon alpha inducible protein 27
Prostate carcinoma	DUBR		DPPA2 upstream binding RNA
Prostate carcinoma	IFNG	P01579	interferon gamma
Prostate carcinoma	IGF1	P05019	insulin like growth factor 1
Prostate carcinoma	IGF2	P01344	insulin like growth factor 2
Prostate carcinoma	IGFBP3	P17936	insulin like growth factor binding protein 3	Enzyme modulator
Prostate carcinoma	APRT	P07741	adenine phosphoribosyltransferase
Prostate carcinoma	TICAM2	Q86XR7;Q9Y3B3	toll like receptor adaptor molecule 2
Prostate carcinoma	IL1B	P01584	interleukin 1 beta
Prostate carcinoma	IL4	P05112	interleukin 4
Prostate carcinoma	IL6	P05231	interleukin 6
Prostate carcinoma	SHROOM2	Q13796	shroom family member 2
Prostate carcinoma	CXCL8	P10145	C-X-C motif chemokine ligand 8	Signaling
Prostate carcinoma	IL10	P22301	interleukin 10
Prostate carcinoma	AR	P10275	androgen receptor	Nuclear receptor
Prostate carcinoma	ITGB7	P26010	integrin subunit beta 7	Receptor
Prostate carcinoma	ITGB8	P26012	integrin subunit beta 8	Receptor
Prostate carcinoma	JUN	P05412	Jun proto-oncogene, AP-1 transcription factor subunit	Transcription factor
Prostate carcinoma	JUNB	P17275	JunB proto-oncogene, AP-1 transcription factor subunit	Transcription factor
Prostate carcinoma	JUND	P17535	JunD proto-oncogene, AP-1 transcription factor subunit	Transcription factor
Prostate carcinoma	GSTK1	Q9Y2Q3	glutathione S-transferase kappa 1
Prostate carcinoma	CD82	P27701	CD82 molecule
Prostate carcinoma	KCND3	Q9UK17	potassium voltage-gated channel subfamily D member 3	Ion channel
Prostate carcinoma	KCNH1	O95259	potassium voltage-gated channel subfamily H member 1	Ion channel
Prostate carcinoma	KCNN3	Q9UGI6	potassium calcium-activated channel subfamily N member 3	Ion channel
Prostate carcinoma	MALAT1		metastasis associated lung adenocarcinoma transcript 1
Prostate carcinoma	KDR	P35968	kinase insert domain receptor	Kinase
Prostate carcinoma	KLK2	P20151	kallikrein related peptidase 2	Enzyme
Prostate carcinoma	KRAS	P01116	KRAS proto-oncogene, GTPase	Enzyme modulator
Prostate carcinoma	AGMO	Q6ZNB7	alkylglycerol monooxygenase
Prostate carcinoma	ARHGAP6	O43182	Rho GTPase activating protein 6	Cellular structure
Prostate carcinoma	LEP	P41159	leptin
Prostate carcinoma	LGALS3	P17931	galectin 3	Signaling
Prostate carcinoma	LMNA	P02545	lamin A/C
Prostate carcinoma	LINC01194		long intergenic non-protein coding RNA 1194
Prostate carcinoma	MIR141		microRNA 141
Prostate carcinoma	MIR143		microRNA 143
Prostate carcinoma	MIR145		microRNA 145
Prostate carcinoma	MIR146A		microRNA 146a
Prostate carcinoma	MIR15A		microRNA 15a
Prostate carcinoma	MIR17		microRNA 17
Prostate carcinoma	MIR182		microRNA 182
Prostate carcinoma	MIR183		microRNA 183
Prostate carcinoma	MIR195		microRNA 195
Prostate carcinoma	MIR200C		microRNA 200c
Prostate carcinoma	MIR203A		microRNA 203a
Prostate carcinoma	MIR204		microRNA 204
Prostate carcinoma	MIR205		microRNA 205
Prostate carcinoma	MIR21		microRNA 21
Prostate carcinoma	MIR221		microRNA 221
Prostate carcinoma	MIR224		microRNA 224
Prostate carcinoma	MIR30D		microRNA 30d
Prostate carcinoma	MIR34A		microRNA 34a
Prostate carcinoma	MIR96		microRNA 96
Prostate carcinoma	EPCAM	P16422	epithelial cell adhesion molecule
Prostate carcinoma	SMAD4	Q13485	SMAD family member 4	Transcription factor
Prostate carcinoma	STS	P08842	steroid sulfatase	Enzyme
Prostate carcinoma	MAOA	P21397	monoamine oxidase A
Prostate carcinoma	LINC00595		long intergenic non-protein coding RNA 595
Prostate carcinoma	MBNL1	Q9NR56	muscleblind like splicing regulator 1	Nucleic acid binding
Prostate carcinoma	MCAM	P43121	melanoma cell adhesion molecule	Cell adhesion
Prostate carcinoma	MCL1	Q07820	MCL1 apoptosis regulator, BCL2 family member	Signaling
Prostate carcinoma	MDM2	Q00987	MDM2 proto-oncogene	Nucleic acid binding
Prostate carcinoma	MET	P08581	MET proto-oncogene, receptor tyrosine kinase	Kinase
Prostate carcinoma	MFAP1	P55081	microfibril associated protein 1	Extracellular structure
Prostate carcinoma	MLH1	P40692	mutL homolog 1	Nucleic acid binding
Prostate carcinoma	MME	P08473	membrane metalloendopeptidase	Enzyme
Prostate carcinoma	MMP2	P08253	matrix metallopeptidase 2	Enzyme
Prostate carcinoma	MMP3	P08254	matrix metallopeptidase 3	Enzyme
Prostate carcinoma	MMP9	P14780	matrix metallopeptidase 9	Enzyme
Prostate carcinoma	MMP14	P50281	matrix metallopeptidase 14	Enzyme
Prostate carcinoma	MRC1	P22897	mannose receptor C-type 1
Prostate carcinoma	MSH2	P43246	mutS homolog 2	Nucleic acid binding
Prostate carcinoma	MSR1	P21757	macrophage scavenger receptor 1	Enzyme
Prostate carcinoma	MST1	P26927	macrophage stimulating 1	Enzyme
Prostate carcinoma	COX2	P00403	cytochrome c oxidase subunit II	Enzyme
Prostate carcinoma	MTHFR	P42898	methylenetetrahydrofolate reductase
Prostate carcinoma	MTX1	Q13505	metaxin 1
Prostate carcinoma	MUC1	P15941	mucin 1, cell surface associated
Prostate carcinoma	MYC	P01106	MYC proto-oncogene, bHLH transcription factor	Transcription factor
Prostate carcinoma	MYCN	P04198	MYCN proto-oncogene, bHLH transcription factor	Transcription factor
Prostate carcinoma	MYO9B	Q13459	myosin IXB
Prostate carcinoma	NBN	O60934	nibrin	Nucleic acid binding
Prostate carcinoma	NFE2L2	Q16236	nuclear factor, erythroid 2 like 2	Enzyme
Prostate carcinoma	NFKB1	P19838	nuclear factor kappa B subunit 1	Transcription factor
Prostate carcinoma	NOS3	P29474	nitric oxide synthase 3
Prostate carcinoma	NOTCH1	P46531	notch receptor 1
Prostate carcinoma	YBX1	P67809	Y-box binding protein 1
Prostate carcinoma	NTS	P30990	neurotensin
Prostate carcinoma	MIR375		microRNA 375
Prostate carcinoma	OGG1	O15527	8-oxoguanine DNA glycosylase
Prostate carcinoma	TNFRSF11B	O00300	TNF receptor superfamily member 11b
Prostate carcinoma	PEBP1	P30086	phosphatidylethanolamine binding protein 1	Enzyme modulator
Prostate carcinoma	PCSK6	P29122	proprotein convertase subtilisin/kexin type 6	Enzyme
Prostate carcinoma	SERPINE1	P05121	serpin family E member 1	Enzyme modulator
Prostate carcinoma	PCA3		prostate cancer associated 3
Prostate carcinoma	PRKN	O60260	parkin RBR E3 ubiquitin protein ligase	Enzyme
Prostate carcinoma	PAX9	P55771	paired box 9
Prostate carcinoma	TMED7	Q86XR7;Q9Y3B3	transmembrane p24 trafficking protein 7	Transporter
Prostate carcinoma	WDPCP	O95876	WD repeat containing planar cell polarity effector
Prostate carcinoma	PCNA	P12004	proliferating cell nuclear antigen	Nucleic acid binding
Prostate carcinoma	KDM3B	Q7LBC6	lysine demethylase 3B	Epigenetic regulator
Prostate carcinoma	PEX14	O75381	peroxisomal biogenesis factor 14	Receptor
Prostate carcinoma	ABCB1	P08183	ATP binding cassette subfamily B member 1	Transporter
Prostate carcinoma	PIK3CA	P42336	phosphatidylinositol-4,5-bisphosphate 3-kinase catalytic subunit alpha	Kinase
Prostate carcinoma	PIK3CB	P42338	phosphatidylinositol-4,5-bisphosphate 3-kinase catalytic subunit beta	Kinase
Prostate carcinoma	PIM1	P11309	Pim-1 proto-oncogene, serine/threonine kinase	Kinase
Prostate carcinoma	PIK3CD	O00329	phosphatidylinositol-4,5-bisphosphate 3-kinase catalytic subunit delta	Kinase
Prostate carcinoma	PIK3CG	P48736	phosphatidylinositol-4,5-bisphosphate 3-kinase catalytic subunit gamma	Kinase
Prostate carcinoma	PITX2	Q99697	paired like homeodomain 2
Prostate carcinoma	PLAG1	Q6DJT9	PLAG1 zinc finger	Transcription factor
Prostate carcinoma	PLAU	P00749	plasminogen activator, urokinase	Enzyme
Prostate carcinoma	PLK1	P53350	polo like kinase 1	Kinase
Prostate carcinoma	CCHCR1	Q8TD31	coiled-coil alpha-helical rod protein 1
Prostate carcinoma	POU5F1	Q01860	POU class 5 homeobox 1
Prostate carcinoma	PPARG	P37231	peroxisome proliferator activated receptor gamma	Nuclear receptor
Prostate carcinoma	HAUS6	Q7Z4H7	HAUS augmin like complex subunit 6
Prostate carcinoma	SIDT1	Q9NXL6	SID1 transmembrane family member 1
Prostate carcinoma	UHRF1BP1	Q6BDS2	UHRF1 binding protein 1
Prostate carcinoma	RNF43	Q68DV7	ring finger protein 43
Prostate carcinoma	ACP3	P15309	acid phosphatase 3	Enzyme
Prostate carcinoma	SPATA6L	Q8N4H0	spermatogenesis associated 6 like
Prostate carcinoma	GOLPH3L	Q9H4A5	golgi phosphoprotein 3 like
Prostate carcinoma	PTPA	Q15257	protein phosphatase 2 phosphatase activator	Enzyme modulator
Prostate carcinoma	VPS53	Q5VIR6	VPS53 subunit of GARP complex
Prostate carcinoma	RNLS	Q5VYX0	renalase, FAD dependent amine oxidase
Prostate carcinoma	TRPV6	Q9H1D0	transient receptor potential cation channel subfamily V member 6	Ion channel
Prostate carcinoma	PRKAA1	Q13131	protein kinase AMP-activated catalytic subunit alpha 1	Kinase
Prostate carcinoma	PRKAA2	P54646	protein kinase AMP-activated catalytic subunit alpha 2	Kinase
Prostate carcinoma	PRKAB1	Q9Y478	protein kinase AMP-activated non-catalytic subunit beta 1	Kinase
Prostate carcinoma	CACNA2D3	Q8IZS8	calcium voltage-gated channel auxiliary subunit alpha2delta 3	Ion channel
Prostate carcinoma	PAG1	Q9NWQ8	phosphoprotein membrane anchor with glycosphingolipid microdomains 1
Prostate carcinoma	PRKD1	Q15139	protein kinase D1	Kinase
Prostate carcinoma	MAPK1	P28482	mitogen-activated protein kinase 1	Kinase
Prostate carcinoma	MAPK3	P27361	mitogen-activated protein kinase 3	Kinase
Prostate carcinoma	MAPK8	P45983	mitogen-activated protein kinase 8	Kinase
Prostate carcinoma	PRL	P01236	prolactin	Signaling
Prostate carcinoma	PROS1	P07225	protein S
Prostate carcinoma	SLC12A9	Q9BXP2	solute carrier family 12 member 9	Transporter
Prostate carcinoma	ACKR3	P25106	atypical chemokine receptor 3	G-protein coupled receptor
Prostate carcinoma	PCBP4	P57723	poly(rC) binding protein 4	Enzyme
Prostate carcinoma	KNL1	Q8NG31	kinetochore scaffold 1
Prostate carcinoma	PSMD9	O00233	proteasome 26S subunit, non-ATPase 9	Enzyme modulator
Prostate carcinoma	ATP10A	O60312	ATPase phospholipid transporting 10A (putative)	Transporter
Prostate carcinoma	TTC7A	Q9ULT0	tetratricopeptide repeat domain 7A
Prostate carcinoma	PTEN	P60484	phosphatase and tensin homolog	Enzyme
Prostate carcinoma	PTGFRN	Q9P2B2	prostaglandin F2 receptor inhibitor
Prostate carcinoma	PTGS2	P35354	prostaglandin-endoperoxide synthase 2	Enzyme
Prostate carcinoma	PTHLH	P12272	parathyroid hormone like hormone
Prostate carcinoma	PTK2	Q05397	protein tyrosine kinase 2	Kinase
Prostate carcinoma	FBRSL1	Q9HCM7	fibrosin like 1
Prostate carcinoma	PTPRS	Q13332	protein tyrosine phosphatase receptor type S	Enzyme
Prostate carcinoma	PVT1		Pvt1 oncogene
Prostate carcinoma	PXN	P49023	paxillin	Cellular structure
Prostate carcinoma	RAC1	P63000	Rac family small GTPase 1	Enzyme modulator
Prostate carcinoma	RAF1	P04049	Raf-1 proto-oncogene, serine/threonine kinase	Kinase
Prostate carcinoma	RARB	P10826	retinoic acid receptor beta	Nuclear receptor
Prostate carcinoma	CCND1	P24385	cyclin D1	Enzyme modulator
Prostate carcinoma	OPN1LW	P04000	opsin 1, long wave sensitive	G-protein coupled receptor
Prostate carcinoma	RELA	Q04206	RELA proto-oncogene, NF-kB subunit	Transcription factor
Prostate carcinoma	ACTB	P60709	actin beta	Cellular structure
Prostate carcinoma	RNASEL	Q05823	ribonuclease L	Kinase
Prostate carcinoma	ELAC2	Q9BQ52	elaC ribonuclease Z 2
Prostate carcinoma	EEFSEC	P57772	eukaryotic elongation factor, selenocysteine-tRNA specific	Enzyme
Prostate carcinoma	ROBO2	Q9HCK4	roundabout guidance receptor 2
Prostate carcinoma	S100A9	P06702	S100 calcium binding protein A9	Calcium-binding protein
Prostate carcinoma	ATXN2	Q99700	ataxin 2	Nucleic acid binding
Prostate carcinoma	BGLAP	P02818	bone gamma-carboxyglutamate protein
Prostate carcinoma	CCL2	P13500	C-C motif chemokine ligand 2	Signaling
Prostate carcinoma	CXCL12	P48061	C-X-C motif chemokine ligand 12
Prostate carcinoma	PKNOX2	Q96KN3	PBX/knotted 1 homeobox 2	Enzyme
Prostate carcinoma	PCGEM1		PCGEM1 prostate-specific transcript
Prostate carcinoma	MS4A5	Q9H3V2	membrane spanning 4-domains A5	Receptor
Prostate carcinoma	POU5F1P3		POU class 5 homeobox 1 pseudogene 3
Prostate carcinoma	POU5F1P4		POU class 5 homeobox 1 pseudogene 4
Prostate carcinoma	SHBG	P04278	sex hormone binding globulin
Prostate carcinoma	EBF2	Q9HAK2	EBF transcription factor 2
Prostate carcinoma	GORASP1	Q9BQQ3	golgi reassembly stacking protein 1
Prostate carcinoma	TNS3	Q68CZ2	tensin 3
Prostate carcinoma	BMI1	P35226	BMI1 proto-oncogene, polycomb ring finger
Prostate carcinoma	RFX7	Q2KHR2	regulatory factor X7	Enzyme
Prostate carcinoma	SKP2	Q13309	S-phase kinase associated protein 2
Prostate carcinoma	WNK1	Q9H4A3	WNK lysine deficient protein kinase 1	Kinase
Prostate carcinoma	SLC2A1	P11166	solute carrier family 2 member 1	Transporter
Prostate carcinoma	SLC5A5	Q92911	solute carrier family 5 member 5	Transporter
Prostate carcinoma	SLC6A8	P48029	solute carrier family 6 member 8	Transporter
Prostate carcinoma	SLCO2A1	Q92959	solute carrier organic anion transporter family member 2A1	Transporter
Prostate carcinoma	SNAI2	O43623	snail family transcriptional repressor 2
Prostate carcinoma	SOD2	P04179	superoxide dismutase 2	Enzyme
Prostate carcinoma	SOX2	P48431	SRY-box transcription factor 2	Transcription factor
Prostate carcinoma	SOX4	Q06945	SRY-box transcription factor 4	Transcription factor
Prostate carcinoma	SOX9	P48436	SRY-box transcription factor 9
Prostate carcinoma	SPARC	P09486	secreted protein acidic and cysteine rich	Signaling
Prostate carcinoma	SPINK1	P00995	serine peptidase inhibitor Kazal type 1
Prostate carcinoma	SPP1	P10451	secreted phosphoprotein 1
Prostate carcinoma	SRC	P12931	SRC proto-oncogene, non-receptor tyrosine kinase	Kinase
Prostate carcinoma	SRD5A2	P31213	steroid 5 alpha-reductase 2	Enzyme
Prostate carcinoma	BRCA1	P38398	BRCA1 DNA repair associated	Enzyme
Prostate carcinoma	SRF	P11831	serum response factor	Transcription factor
Prostate carcinoma	SST	P61278	somatostatin	Signaling
Prostate carcinoma	SSTR4	P31391	somatostatin receptor 4	G-protein coupled receptor
Prostate carcinoma	ST14	Q9Y5Y6	suppression of tumorigenicity 14	Enzyme
Prostate carcinoma	STAT3	P40763	signal transducer and activator of transcription 3	Nucleic acid binding
Prostate carcinoma	STAT5A	P42229	signal transducer and activator of transcription 5A	Nucleic acid binding
Prostate carcinoma	STAT5B	P51692	signal transducer and activator of transcription 5B	Nucleic acid binding
Prostate carcinoma	AURKA	O14965	aurora kinase A	Kinase
Prostate carcinoma	BRS3	P32247	bombesin receptor subtype 3	G-protein coupled receptor
Prostate carcinoma	BSG	P35613	basigin (Ok blood group)
Prostate carcinoma	ABCC8	Q09428	ATP binding cassette subfamily C member 8	Transporter
Prostate carcinoma	SYT1	P21579	synaptotagmin 1	Transporter
Prostate carcinoma	KLF5	Q13887	Kruppel like factor 5	Nucleic acid binding
Prostate carcinoma	TBX1	O43435	T-box transcription factor 1	Transcription factor
Prostate carcinoma	ZEB1	P37275	zinc finger E-box binding homeobox 1	Transcription factor
Prostate carcinoma	TERT	O14746	telomerase reverse transcriptase	Enzyme
Prostate carcinoma	TFF3	Q07654	trefoil factor 3	Signaling
Prostate carcinoma	TGFB1	P01137	transforming growth factor beta 1	Signaling
Prostate carcinoma	TGFBR2	P37173	transforming growth factor beta receptor 2	Kinase
Prostate carcinoma	THBS1	P07996	thrombospondin 1
Prostate carcinoma	TIMP1	P01033	TIMP metallopeptidase inhibitor 1	Enzyme modulator
Prostate carcinoma	TLR4	O00206	toll like receptor 4
Prostate carcinoma	TMPRSS2	O15393	transmembrane serine protease 2	Enzyme
Prostate carcinoma	TNF	P01375	tumor necrosis factor	Signaling
Prostate carcinoma	TP53	P04637	tumor protein p53	Transcription factor
Prostate carcinoma	TPD52	P55327	tumor protein D52
Prostate carcinoma	CASC8		cancer susceptibility 8
Prostate carcinoma	TWIST1	Q15672	twist family bHLH transcription factor 1	Transcription factor
Prostate carcinoma	CCR2	P41597	C-C motif chemokine receptor 2
Prostate carcinoma	UGT2B15	P54855	UDP glucuronosyltransferase family 2 member B15
Prostate carcinoma	UGT2B17	O75795	UDP glucuronosyltransferase family 2 member B17
Prostate carcinoma	VDR	P11473	vitamin D receptor	Nuclear receptor
Prostate carcinoma	VEGFA	P15692	vascular endothelial growth factor A	Signaling
Prostate carcinoma	VEGFC	P49767	vascular endothelial growth factor C	Signaling
Prostate carcinoma	VIM	P08670	vimentin
Prostate carcinoma	VIP	P01282	vasoactive intestinal peptide	Signaling
Prostate carcinoma	WNT5A	P41221	Wnt family member 5A	Signaling
Prostate carcinoma	XRCC1	P18887	X-ray repair cross complementing 1
Prostate carcinoma	PCAP		predisposing for prostate cancer
Prostate carcinoma	CXCR4	P61073	C-X-C motif chemokine receptor 4	G-protein coupled receptor
Prostate carcinoma	CYREN	Q9BWK5	cell cycle regulator of NHEJ
Prostate carcinoma	GGCT	O75223	gamma-glutamylcyclotransferase
Prostate carcinoma	TRPM8	Q7Z2W7	transient receptor potential cation channel subfamily M member 8	Ion channel
Prostate carcinoma	FSD1	Q9BTV5	fibronectin type III and SPRY domain containing 1
Prostate carcinoma	MUL1	Q969V5	mitochondrial E3 ubiquitin protein ligase 1
Prostate carcinoma	CALCA	P01258;P06881	calcitonin related polypeptide alpha	Signaling
Prostate carcinoma	AIMP2	Q13155	aminoacyl tRNA synthetase complex interacting multifunctional protein 2
Prostate carcinoma	ZNF385D	Q9H6B1	zinc finger protein 385D
Prostate carcinoma	SUGCT	Q9HAC7	succinyl-CoA:glutarate-CoA transferase
Prostate carcinoma	MOB3B	Q86TA1	MOB kinase activator 3B	Enzyme modulator
Prostate carcinoma	CALCR	P30988	calcitonin receptor	G-protein coupled receptor
Prostate carcinoma	ATAT1	Q5SQI0	alpha tubulin acetyltransferase 1
Prostate carcinoma	PSCA	O43653	prostate stem cell antigen
Prostate carcinoma	NCOA4	Q13772	nuclear receptor coactivator 4	Transcription factor
Prostate carcinoma	CALR	P27797	calreticulin	Calcium-binding protein
Prostate carcinoma	OR51E2	Q9H255	olfactory receptor family 51 subfamily E member 2	G-protein coupled receptor
Prostate carcinoma	MOB2	Q70IA6	MOB kinase activator 2	Enzyme modulator
Prostate carcinoma	APOLD1	Q96LR9	apolipoprotein L domain containing 1	Transporter
Prostate carcinoma	TRIM8	Q9BZR9	tripartite motif containing 8
Prostate carcinoma	NCOA3	Q9Y6Q9	nuclear receptor coactivator 3	Kinase
Prostate carcinoma	CASP3	P42574	caspase 3	Enzyme
Prostate carcinoma	MAD1L1	Q9Y6D9	mitotic arrest deficient 1 like 1
Prostate carcinoma	FSD1L	Q9BXM9	fibronectin type III and SPRY domain containing 1 like
Prostate carcinoma	USHBP1	Q8N6Y0	USH1 protein network component harmonin binding protein 1
Prostate carcinoma	SPOP	O43791	speckle type BTB/POZ protein
Prostate carcinoma	ARMC2	Q8NEN0	armadillo repeat containing 2
Prostate carcinoma	CASP9	P55211	caspase 9	Enzyme
Prostate carcinoma	CASR	P41180	calcium sensing receptor	G-protein coupled receptor
Prostate carcinoma	CAT	P04040	catalase	Enzyme
Prostate carcinoma	TUBA1C	Q9BQE3	tubulin alpha 1c	Cellular structure
Prostate carcinoma	CBX4	O00257	chromobox 4
Prostate carcinoma	SLC45A3	Q96JT2	solute carrier family 45 member 3	Transporter
Prostate carcinoma	TANC1	Q9C0D5	tetratricopeptide repeat, ankyrin repeat and coiled-coil containing 1
Prostate carcinoma	CAV1	Q03135	caveolin 1	Enzyme modulator
Prostate carcinoma	RUNX2	Q13950	RUNX family transcription factor 2	Transcription factor
Prostate carcinoma	TNFSF11	O14788	TNF superfamily member 11	Signaling
Prostate carcinoma	TP63	Q9H3D4	tumor protein p63	Transcription factor
Prostate carcinoma	AKR1C3	P42330	aldo-keto reductase family 1 member C3	Enzyme
Prostate carcinoma	DYNLL1	P63167	dynein light chain LC8-type 1	Cellular structure
Prostate carcinoma	VAMP8	Q9BV40	vesicle associated membrane protein 8
Prostate carcinoma	TNFRSF25	Q93038	TNF receptor superfamily member 25
Prostate carcinoma	TNFSF10	P50591	TNF superfamily member 10	Signaling
Prostate carcinoma	SUCLG2	Q96I99	succinate-CoA ligase GDP-forming subunit beta	Enzyme
Prostate carcinoma	PROM1	O43490	prominin 1	Transporter
Prostate carcinoma	NR1I2	O75469	nuclear receptor subfamily 1 group I member 2	Nuclear receptor
Prostate carcinoma	MBD2	Q9UBB5	methyl-CpG binding domain protein 2	Epigenetic regulator
Prostate carcinoma	CCND2	P30279	cyclin D2	Enzyme modulator
Prostate carcinoma	HSPB3	Q12988	heat shock protein family B (small) member 3
Prostate carcinoma	SOCS3	O14543	suppressor of cytokine signaling 3	Enzyme modulator
Prostate carcinoma	MTA1	Q13330	metastasis associated 1	Nucleic acid binding
Prostate carcinoma	COL23A1	Q86Y22	collagen type XXIII alpha 1 chain
Prostate carcinoma	LPAR2	Q9HBW0	lysophosphatidic acid receptor 2	G-protein coupled receptor
Prostate carcinoma	HTR3B	O95264	5-hydroxytryptamine receptor 3B	Ion channel
Prostate carcinoma	ZBED1	O96006	zinc finger BED-type containing 1
Prostate carcinoma	DLGAP2	Q9P1A6	DLG associated protein 2	Receptor
Prostate carcinoma	NUMBL	Q9Y6R0	NUMB like endocytic adaptor protein	Signaling
Prostate carcinoma	DNER	Q8NFT8	delta/notch like EGF repeat containing
Prostate carcinoma	KLF4	O43474	Kruppel like factor 4	Nucleic acid binding
Prostate carcinoma	LONP1	P36776	lon peptidase 1, mitochondrial	Enzyme
Prostate carcinoma	ADIPOQ	Q15848	adiponectin, C1Q and collagen domain containing
Prostate carcinoma	GRAP2	O75791	GRB2 related adaptor protein 2
Prostate carcinoma	GDF15	Q99988	growth differentiation factor 15	Signaling
Prostate carcinoma	NPEPPS	P55786	aminopeptidase puromycin sensitive	Enzyme
Prostate carcinoma	HPCX		hereditary prostate cancer, X-linked
Prostate carcinoma	CD44	P16070	CD44 molecule (Indian blood group)
Prostate carcinoma	KLK4	Q9Y5K2	kallikrein related peptidase 4	Enzyme
Prostate carcinoma	HDAC9	Q9UKV0	histone deacetylase 9	Epigenetic regulator
Prostate carcinoma	FARP2	O94887	FERM, ARH/RhoGEF and pleckstrin domain protein 2
Prostate carcinoma	CDH1	P12830	cadherin 1
Prostate carcinoma	CDK5	Q00535	cyclin dependent kinase 5	Kinase
Prostate carcinoma	CENPF	P49454	centromere protein F
Prostate carcinoma	CAMKK2	Q96RR4	calcium/calmodulin dependent protein kinase kinase 2	Kinase
Prostate carcinoma	PSIP1	O75475	PC4 and SFRS1 interacting protein 1	Signaling
Prostate carcinoma	AZIN2	Q96A70	antizyme inhibitor 2	Enzyme
Prostate carcinoma	ADM	P35318	adrenomedullin	Signaling
Prostate carcinoma	CYP3A5	P20815	cytochrome P450 family 3 subfamily A member 5	Enzyme
Prostate carcinoma	NQO1	P15559	NAD(P)H quinone dehydrogenase 1
Prostate carcinoma	DNMT3B	Q9UBC3	DNA methyltransferase 3 beta
Prostate carcinoma	AKT2	P31751	AKT serine/threonine kinase 2	Kinase
Prostate carcinoma	ETS2	P15036	ETS proto-oncogene 2, transcription factor	Transcription factor
Prostate carcinoma	DKK1	O94907	dickkopf WNT signaling pathway inhibitor 1
Prostate carcinoma	KDM1A	O60341	lysine demethylase 1A	Epigenetic regulator
Prostate carcinoma	SMUG1	Q53HV7	single-strand-selective monofunctional uracil-DNA glycosylase 1
Prostate carcinoma	TMEFF2	Q9UIK5	transmembrane protein with EGF like and two follistatin like domains 2	Enzyme modulator
Prostate carcinoma	SENP1	Q9P0U3	SUMO specific peptidase 1	Enzyme
Prostate carcinoma	ANXA7	P20073	annexin A7
Prostate carcinoma	GADL1	Q6ZQY3	glutamate decarboxylase like 1
Prostate carcinoma	IFNB1	P01574	interferon beta 1
Prostate carcinoma	CCN1	O00622	cellular communication network factor 1	Signaling
Prostate carcinoma	IL1A	P01583	interleukin 1 alpha
Prostate carcinoma	IL18	Q14116	interleukin 18
Prostate carcinoma	ILK	Q13418	integrin linked kinase	Kinase
Prostate carcinoma	JAK2	O60674	Janus kinase 2	Kinase
Prostate carcinoma	LCN2	P80188	lipocalin 2	Enzyme
Prostate carcinoma	MIR222		microRNA 222
Prostate carcinoma	MIR31		microRNA 31
Prostate carcinoma	ASAH1	Q13510	N-acylsphingosine amidohydrolase 1	Enzyme
Prostate carcinoma	MMP1	P03956	matrix metallopeptidase 1	Enzyme
Prostate carcinoma	NGF	P01138	nerve growth factor	Signaling
Prostate carcinoma	PAEP	P09466	progestagen associated endometrial protein	Enzyme
Prostate carcinoma	PAWR	Q96IZ0	pro-apoptotic WT1 regulator
Prostate carcinoma	GDE1	Q9NZC3	glycerophosphodiester phosphodiesterase 1
Prostate carcinoma	MED15	Q96RN5	mediator complex subunit 15
Prostate carcinoma	SERPINF1	P36955	serpin family F member 1	Enzyme modulator
Prostate carcinoma	PGR	P06401	progesterone receptor	Nuclear receptor
Prostate carcinoma	PKM	P14618	pyruvate kinase M1/2	Kinase
Prostate carcinoma	PLG	P00747	plasminogen	Enzyme
Prostate carcinoma	PTOV1	Q86YD1	PTOV1 extended AT-hook containing adaptor protein	Transcription factor
Prostate carcinoma	KLK15	Q9H2R5	kallikrein related peptidase 15	Enzyme
Prostate carcinoma	EAF2	Q96CJ1	ELL associated factor 2
Prostate carcinoma	AZGP1	P25311	alpha-2-glycoprotein 1, zinc-binding
Prostate carcinoma	RAD51	Q06609	RAD51 recombinase
Prostate carcinoma	RARRES1	P49788	retinoic acid receptor responder 1	Enzyme modulator
Prostate carcinoma	ROCK1	Q13464	Rho associated coiled-coil containing protein kinase 1	Kinase
Prostate carcinoma	ROS1	P08922	ROS proto-oncogene 1, receptor tyrosine kinase	Kinase
Prostate carcinoma	S100A8	P05109	S100 calcium binding protein A8	Calcium-binding protein
Prostate carcinoma	CCL5	P13501	C-C motif chemokine ligand 5	Signaling
Prostate carcinoma	MAP2K4	P45985	mitogen-activated protein kinase kinase 4	Kinase
Prostate carcinoma	SREBF1	P36956	sterol regulatory element binding transcription factor 1
Prostate carcinoma	TGFB1I1	O43294	transforming growth factor beta 1 induced transcript 1	Cellular structure
Prostate carcinoma	TGM4	P49221	transglutaminase 4	Enzyme
Prostate carcinoma	TIMP2	P16035	TIMP metallopeptidase inhibitor 2	Enzyme modulator
Prostate carcinoma	COL18A1	P39060	collagen type XVIII alpha 1 chain
Prostate carcinoma	NCOA1	Q15788	nuclear receptor coactivator 1	Kinase
Prostate carcinoma	TNFRSF10B	O14763	TNF receptor superfamily member 10b
Prostate carcinoma	NRP1	O14786	neuropilin 1
Prostate carcinoma	CFLAR	O15519	CASP8 and FADD like apoptosis regulator	Enzyme
Prostate carcinoma	SQSTM1	Q13501	sequestosome 1
Prostate carcinoma	MTDH	Q86UE4	metadherin
Prostate carcinoma	KDM4A	O75164	lysine demethylase 4A
Prostate carcinoma	SCHLAP1		SWI/SNF complex antagonist associated with prostate cancer 1
Prostate carcinoma	CDK2	P24941	cyclin dependent kinase 2	Kinase
Prostate carcinoma	NCOA2	Q15596	nuclear receptor coactivator 2	Enzyme
Prostate carcinoma	KAT5	Q92993	lysine acetyltransferase 5
Prostate carcinoma	CKAP4	Q07065	cytoskeleton associated protein 4
Prostate carcinoma	AGT	P01019	angiotensinogen	Enzyme modulator
Prostate carcinoma	E2F3	O00716	E2F transcription factor 3	Nucleic acid binding
Prostate carcinoma	EDN1	P05305	endothelin 1	Signaling
Prostate carcinoma	EIF4EBP1	Q13541	eukaryotic translation initiation factor 4E binding protein 1	Nucleic acid binding
Prostate carcinoma	ELK1	P19419	ETS transcription factor ELK1	Transcription factor
Prostate carcinoma	ETS1	P14921	ETS proto-oncogene 1, transcription factor	Transcription factor
Prostate carcinoma	ETV5	P41161	ETS variant transcription factor 5	Transcription factor
Prostate carcinoma	F3	P13726	coagulation factor III, tissue factor	Receptor
Prostate carcinoma	FKBP4	Q02790	FKBP prolyl isomerase 4	Enzyme
Prostate carcinoma	GNRHR	P30968	gonadotropin releasing hormone receptor	G-protein coupled receptor
Prostate carcinoma	ICAM1	P05362	intercellular adhesion molecule 1
Prostate carcinoma	PWAR4		Prader Willi/Angelman region RNA 4
Prostate carcinoma	IGFBP1	P08833	insulin like growth factor binding protein 1	Enzyme modulator
Prostate carcinoma	INSR	P06213	insulin receptor	Kinase
Prostate carcinoma	LOX	P28300	lysyl oxidase
Prostate carcinoma	MIR193A		microRNA 193a
Prostate carcinoma	TACSTD2	P09758	tumor associated calcium signal transducer 2
Prostate carcinoma	MIR29A		microRNA 29a
Prostate carcinoma	MIR301A		microRNA 301a
Prostate carcinoma	MIR30C2		microRNA 30c-2
Prostate carcinoma	MGMT	P16455	O-6-methylguanine-DNA methyltransferase
Prostate carcinoma	MIR133B		microRNA 133b
Prostate carcinoma	NTSR1	P30989	neurotensin receptor 1	G-protein coupled receptor
Prostate carcinoma	FOXP3	Q9BZS1	forkhead box P3
Prostate carcinoma	GOLM1	Q8NBJ4	golgi membrane protein 1
Prostate carcinoma	PHB	P35232	prohibitin
Prostate carcinoma	PLA2G1B	P04054	phospholipase A2 group IB	Enzyme
Prostate carcinoma	PML	P29590	promyelocytic leukemia
Prostate carcinoma	MAP2K7	O14733	mitogen-activated protein kinase kinase 7	Kinase
Prostate carcinoma	CIP2A	Q8TCG1	cellular inhibitor of PP2A
Prostate carcinoma	RPE65	Q16518	retinoid isomerohydrolase RPE65	Enzyme
Prostate carcinoma	SATB1	Q01826	SATB homeobox 1	Transcription factor
Prostate carcinoma	SDC1	P18827	syndecan 1	Extracellular structure
Prostate carcinoma	SELENOP	P49908	selenoprotein P	Extracellular structure
Prostate carcinoma	SGK1	O00141	serum/glucocorticoid regulated kinase 1	Kinase
Prostate carcinoma	BMP6	P22004	bone morphogenetic protein 6	Signaling
Prostate carcinoma	TGFA	P01135	transforming growth factor alpha	Signaling
Prostate carcinoma	TIMP3	P35625	TIMP metallopeptidase inhibitor 3	Enzyme modulator
Prostate carcinoma	TP73	O15350	tumor protein p73	Transcription factor
Prostate carcinoma	UVRAG	Q9P2Y5	UV radiation resistance associated
Prostate carcinoma	YWHAZ	P63104	tyrosine 3-monooxygenase/tryptophan 5-monooxygenase activation protein zeta	Chaperone
Prostate carcinoma	PDGFD	Q9GZP0	platelet derived growth factor D	Signaling
Prostate carcinoma	CCK	P06307	cholecystokinin
Prostate carcinoma	F2RL3	Q96RI0	F2R like thrombin or trypsin receptor 3	G-protein coupled receptor
Prostate carcinoma	GPRC5A	Q8NFJ5	G protein-coupled receptor class C group 5 member A	G-protein coupled receptor
Prostate carcinoma	AURKB	Q96GD4	aurora kinase B	Kinase
Prostate carcinoma	PTTG1	O95997	PTTG1 regulator of sister chromatid separation, securin
Prostate carcinoma	CDC6	Q99741	cell division cycle 6
Prostate carcinoma	CBR3-AS1		CBR3 antisense RNA 1
Prostate carcinoma	CDH11	P55287	cadherin 11
Prostate carcinoma	CDK4	P11802	cyclin dependent kinase 4	Kinase
Prostate carcinoma	CDX2	Q99626	caudal type homeobox 2	Transcription factor
Prostate carcinoma	POSTN	Q15063	periostin	Signaling
Prostate carcinoma	CTCF	P49711	CCCTC-binding factor	Transcription factor
Prostate carcinoma	PPARGC1A	Q9UBK2	PPARG coactivator 1 alpha	Transcription factor
Prostate carcinoma	KLK11	Q9UBX7	kallikrein related peptidase 11	Enzyme
Prostate carcinoma	SLCO2B1	O94956	solute carrier organic anion transporter family member 2B1	Transporter
Prostate carcinoma	CTBP1	Q13363	C-terminal binding protein 1	Transcription factor
Prostate carcinoma	CTLA4	P16410	cytotoxic T-lymphocyte associated protein 4
Prostate carcinoma	CTNND2	Q9UQB3	catenin delta 2	Cellular structure
Prostate carcinoma	PLB1	Q6P1J6	phospholipase B1
Prostate carcinoma	OXER1	Q8TDS5	oxoeicosanoid receptor 1	G-protein coupled receptor
Prostate carcinoma	DLX1	P56177	distal-less homeobox 1	Transcription factor
Prostate carcinoma	DPYSL3	Q14195	dihydropyrimidinase like 3	Enzyme
Prostate carcinoma	JAG1	P78504	jagged canonical Notch ligand 1
Prostate carcinoma	F2R	P25116	coagulation factor II thrombin receptor	G-protein coupled receptor
Prostate carcinoma	FOLH1B	Q9HBA9	folate hydrolase 1B	Enzyme
Prostate carcinoma	NUP62	P37198	nucleoporin 62	Transporter
Prostate carcinoma	IL27	Q8NEV9	interleukin 27
Prostate carcinoma	STEAP2	Q8NFT2	STEAP2 metalloreductase
Prostate carcinoma	GC	P02774	GC vitamin D binding protein	Transporter
Prostate carcinoma	SLC39A1	Q9NY26	solute carrier family 39 member 1	Transporter
Prostate carcinoma	GTF2H1	P32780	general transcription factor IIH subunit 1	Transcription factor
Prostate carcinoma	TBX21	Q9UL17	T-box transcription factor 21	Transcription factor
Prostate carcinoma	HOXC6	P09630	homeobox C6	Transcription factor
Prostate carcinoma	HOXD3	P31249	homeobox D3
Prostate carcinoma	HSD17B3	P37058	hydroxysteroid 17-beta dehydrogenase 3
Prostate carcinoma	HTC2		hypertrichosis 2 (generalized, congenital)
Prostate carcinoma	IGFBP2	P18065	insulin like growth factor binding protein 2	Enzyme modulator
Prostate carcinoma	IGFBP7	Q16270	insulin like growth factor binding protein 7
Prostate carcinoma	FAS	P25445	Fas cell surface death receptor
Prostate carcinoma	CXCR2	P25025	C-X-C motif chemokine receptor 2	G-protein coupled receptor
Prostate carcinoma	IL15	P40933	interleukin 15
Prostate carcinoma	KRT18	P05783	keratin 18
Prostate carcinoma	LGALS1	P09382	galectin 1	Signaling
Prostate carcinoma	MIRLET7C		microRNA let-7c
Prostate carcinoma	MIR100		microRNA 100
Prostate carcinoma	MIR185		microRNA 185
Prostate carcinoma	MIR186		microRNA 186
Prostate carcinoma	MIR200B		microRNA 200b
Prostate carcinoma	MIR210		microRNA 210
Prostate carcinoma	MIR212		microRNA 212
Prostate carcinoma	MIR23B		microRNA 23b
Prostate carcinoma	MIR27A		microRNA 27a
Prostate carcinoma	MIR30C1		microRNA 30c-1
Prostate carcinoma	MIR34B		microRNA 34b
Prostate carcinoma	HPC3		Prostate cancer, hereditary, 3
Prostate carcinoma	MPO	P05164	myeloperoxidase	Enzyme
Prostate carcinoma	KLK14	Q9P0G3	kallikrein related peptidase 14	Enzyme
Prostate carcinoma	ZFHX3	Q15911;Q6ZP98	zinc finger homeobox 3
Prostate carcinoma	NME1	P15531	NME/NM23 nucleoside diphosphate kinase 1	Kinase
Prostate carcinoma	CCN3	P48745	cellular communication network factor 3	Signaling
Prostate carcinoma	ODC1	P11926	ornithine decarboxylase 1	Enzyme
Prostate carcinoma	PDCD1	Q15116	programmed cell death 1
Prostate carcinoma	PDGFRB	P09619	platelet derived growth factor receptor beta	Kinase
Prostate carcinoma	WWOX	Q9NZC7	WW domain containing oxidoreductase	Enzyme
Prostate carcinoma	PIN1	Q13526	peptidylprolyl cis/trans isomerase, NIMA-interacting 1
Prostate carcinoma	PMS2	P54278	PMS1 homolog 2, mismatch repair system component	Nucleic acid binding
Prostate carcinoma	TLR9	Q9NR96	toll like receptor 9
Prostate carcinoma	TRPM4	Q8TD43	transient receptor potential cation channel subfamily M member 4	Ion channel
Prostate carcinoma	MIR449A		microRNA 449a
Prostate carcinoma	AXL	P30530	AXL receptor tyrosine kinase	Kinase
Prostate carcinoma	DCAF6	Q58WW2	DDB1 and CUL4 associated factor 6	Enzyme modulator
Prostate carcinoma	PRKDC	P78527	protein kinase, DNA-activated, catalytic subunit	Kinase
Prostate carcinoma	MAPK7	Q13164	mitogen-activated protein kinase 7	Kinase
Prostate carcinoma	PSMA1	P25786	proteasome 20S subunit alpha 1
Prostate carcinoma	PMEPA1	Q969W9	prostate transmembrane protein, androgen induced 1
Prostate carcinoma	NDRG2	Q9UN36	NDRG family member 2	Enzyme
Prostate carcinoma	MIB1	Q86YT6	mindbomb E3 ubiquitin protein ligase 1	Enzyme
Prostate carcinoma	RAD9A	Q99638	RAD9 checkpoint clamp component A	Enzyme modulator
Prostate carcinoma	REN	P00797	renin	Enzyme
Prostate carcinoma	GAS5		growth arrest specific 5
Prostate carcinoma	BCR	P11274	BCR activator of RhoGEF and GTPase	Enzyme modulator
Prostate carcinoma	S100A4	P26447	S100 calcium binding protein A4	Calcium-binding protein
Prostate carcinoma	SFRP1	Q8N474	secreted frizzled related protein 1
Prostate carcinoma	BMP2	P12643	bone morphogenetic protein 2	Signaling
Prostate carcinoma	BMP7	P18075	bone morphogenetic protein 7	Signaling
Prostate carcinoma	SNAI1	O95863	snail family transcriptional repressor 1
Prostate carcinoma	SP1	P08047	Sp1 transcription factor	Nucleic acid binding
Prostate carcinoma	STAT1	P42224	signal transducer and activator of transcription 1	Nucleic acid binding
Prostate carcinoma	TGFB2	P61812	transforming growth factor beta 2	Signaling
Prostate carcinoma	TLR3	O15455	toll like receptor 3	Receptor
Prostate carcinoma	NR2C2	P49116	nuclear receptor subfamily 2 group C member 2	Nuclear receptor
Prostate carcinoma	TRAF6	Q9Y4K3	TNF receptor associated factor 6	Signaling
Prostate carcinoma	POTEF	A5A3E0	POTE ankyrin domain family member F
Prostate carcinoma	XPC	Q01831	XPC complex subunit, DNA damage recognition and repair factor	Nucleic acid binding
Prostate carcinoma	NANOG	Q9H9S0	Nanog homeobox	Transcription factor
Prostate carcinoma	ARHGAP24	Q8N264	Rho GTPase activating protein 24
Prostate carcinoma	TMPRSS13	Q9BYE2	transmembrane serine protease 13	Enzyme
Prostate carcinoma	ADAM9	Q13443	ADAM metallopeptidase domain 9	Enzyme
Prostate carcinoma	TNFRSF11A	Q9Y6Q6	TNF receptor superfamily member 11a
Prostate carcinoma	INPP4B	O15327	inositol polyphosphate-4-phosphatase type II B
Prostate carcinoma	LMLN	Q96KR4	leishmanolysin like peptidase	Enzyme
Prostate carcinoma	CDK1	P06493	cyclin dependent kinase 1	Kinase
Prostate carcinoma	SRA1	Q9HD15	steroid receptor RNA activator 1
Prostate carcinoma	HOTAIR		HOX transcript antisense RNA
Prostate carcinoma	SPRY2	O43597	sprouty RTK signaling antagonist 2	Signaling
Prostate carcinoma	HPSE	Q9Y251	heparanase	Enzyme
Prostate carcinoma	UBE2C	O00762	ubiquitin conjugating enzyme E2 C
Prostate carcinoma	PRRT2	Q7Z6L0	proline rich transmembrane protein 2
Prostate carcinoma	CHUK	O15111	component of inhibitor of nuclear factor kappa B kinase complex	Kinase
Prostate carcinoma	CCR5	P51681	C-C motif chemokine receptor 5 (gene/pseudogene)	G-protein coupled receptor
Prostate carcinoma	CCR7	P32248	C-C motif chemokine receptor 7	G-protein coupled receptor
Prostate carcinoma	CREB1	P16220	cAMP responsive element binding protein 1
Prostate carcinoma	CSTA	P01040	cystatin A	Enzyme modulator
Prostate carcinoma	CYP2B6	P20813	cytochrome P450 family 2 subfamily B member 6
Prostate carcinoma	TIMM8A	O60220	translocase of inner mitochondrial membrane 8A
Prostate carcinoma	DUSP1	P28562	dual specificity phosphatase 1
Prostate carcinoma	AGTR1	P30556	angiotensin II receptor type 1	G-protein coupled receptor
Prostate carcinoma	ENO2	P09104	enolase 2	Enzyme
Prostate carcinoma	EPHA3	P29320	EPH receptor A3	Kinase
Prostate carcinoma	ERBB3	P21860	erb-b2 receptor tyrosine kinase 3	Kinase
Prostate carcinoma	ERCC5	P28715	ERCC excision repair 5, endonuclease
Prostate carcinoma	ESRRB	O95718	estrogen related receptor beta	Nuclear receptor
Prostate carcinoma	ALDH1A1	P00352	aldehyde dehydrogenase 1 family member A1	Enzyme
Prostate carcinoma	FABP5	Q01469	fatty acid binding protein 5
Prostate carcinoma	FGF7	P21781	fibroblast growth factor 7	Signaling
Prostate carcinoma	FGFR3	P22607	fibroblast growth factor receptor 3	Kinase
Prostate carcinoma	FLT1	P17948	fms related receptor tyrosine kinase 1	Kinase
Prostate carcinoma	SEC14L2	O76054	SEC14 like lipid binding 2
Prostate carcinoma	LPAR3	Q9UBY5	lysophosphatidic acid receptor 3	G-protein coupled receptor
Prostate carcinoma	ALOX15B	O15296	arachidonate 15-lipoxygenase type B	Enzyme
Prostate carcinoma	GAPDH	P04406	glyceraldehyde-3-phosphate dehydrogenase	Enzyme
Prostate carcinoma	SH2B1	Q9NRF2	SH2B adaptor protein 1
Prostate carcinoma	GAS6	Q14393	growth arrest specific 6	Extracellular structure
Prostate carcinoma	GH1	P01241	growth hormone 1	Signaling
Prostate carcinoma	SLCO1B3	Q9NPD5	solute carrier organic anion transporter family member 1B3	Transporter
Prostate carcinoma	ANG	P03950	angiogenin
Prostate carcinoma	NEAT1		nuclear paraspeckle assembly transcript 1
Prostate carcinoma	LYPD5	Q6UWN5	LY6/PLAUR domain containing 5
Prostate carcinoma	GPX3	P22352	glutathione peroxidase 3	Enzyme
Prostate carcinoma	CXCL1	P09341	C-X-C motif chemokine ligand 1	Signaling
Prostate carcinoma	GTF2H2	Q13888	general transcription factor IIH subunit 2	Transcription factor
Prostate carcinoma	ANXA5	P08758	annexin A5
Prostate carcinoma	HLA-A	P04439	major histocompatibility complex, class I, A
Prostate carcinoma	HSD3B2	P26439	hydroxy-delta-5-steroid dehydrogenase, 3 beta- and steroid delta-isomerase 2	Enzyme
Prostate carcinoma	ID1	P41134	inhibitor of DNA binding 1, HLH protein	Transcription factor
Prostate carcinoma	ID4	P47928	inhibitor of DNA binding 4, HLH protein	Transcription factor
Prostate carcinoma	IDH1	O75874	isocitrate dehydrogenase (NADP(+)) 1
Prostate carcinoma	IL2	P60568	interleukin 2
Prostate carcinoma	INHA	P05111	inhibin subunit alpha	Signaling
Prostate carcinoma	STMN1	P16949	stathmin 1
Prostate carcinoma	MIR152		microRNA 152
Prostate carcinoma	MIR20A		microRNA 20a
Prostate carcinoma	SMAD2	Q15796	SMAD family member 2	Transcription factor
Prostate carcinoma	SMAD3	P84022	SMAD family member 3	Transcription factor
Prostate carcinoma	KMT2A	Q03164	lysine methyltransferase 2A
Prostate carcinoma	VN1R17P	Q8TDU5	vomeronasal 1 receptor 17 pseudogene
Prostate carcinoma	MIR331		microRNA 331
Prostate carcinoma	MSH3	P20585	mutS homolog 3	Nucleic acid binding
Prostate carcinoma	COX1	P00395	cytochrome c oxidase subunit I	Enzyme
Prostate carcinoma	MTR	Q99707	5-methyltetrahydrofolate-homocysteine methyltransferase
Prostate carcinoma	ATF3	P18847	activating transcription factor 3	Transcription factor
Prostate carcinoma	NKX3-1	Q99801	NK3 homeobox 1	Transcription factor
Prostate carcinoma	NOS2	P35228	nitric oxide synthase 2
Prostate carcinoma	PNP	P00491	purine nucleoside phosphorylase	Enzyme
Prostate carcinoma	NTRK1	P04629	neurotrophic receptor tyrosine kinase 1	Kinase
Prostate carcinoma	PRDX1	Q06830	peroxiredoxin 1	Enzyme
Prostate carcinoma	DCTN4	Q9UJW0	dynactin subunit 4
Prostate carcinoma	LEF1	Q9UJU2	lymphoid enhancer binding factor 1
Prostate carcinoma	HSD17B7	P56937	hydroxysteroid 17-beta dehydrogenase 7
Prostate carcinoma	PGK1	P00558	phosphoglycerate kinase 1	Kinase
Prostate carcinoma	PLAT	P00750	plasminogen activator, tissue type	Enzyme
Prostate carcinoma	PON1	P27169	paraoxonase 1
Prostate carcinoma	PPARA	Q07869	peroxisome proliferator activated receptor alpha	Nuclear receptor
Prostate carcinoma	PPP5C	P53041	protein phosphatase 5 catalytic subunit
Prostate carcinoma	IMPACT	Q9P2X3	impact RWD domain protein
Prostate carcinoma	NLRP2	Q9NX02	NLR family pyrin domain containing 2
Prostate carcinoma	PRKCA	P17252	protein kinase C alpha	Kinase
Prostate carcinoma	PRKCB	P05771	protein kinase C beta	Kinase
Prostate carcinoma	PKN1	Q16512	protein kinase N1	Kinase
Prostate carcinoma	TDRD1	Q9BXT4	tudor domain containing 1	Enzyme
Prostate carcinoma	PSAP	P07602	prosaposin
Prostate carcinoma	PAK6	Q9NQU5	p21 (RAC1) activated kinase 6
Prostate carcinoma	CHPT1	Q8WUD6	choline phosphotransferase 1	Enzyme
Prostate carcinoma	MIR193B		microRNA 193b
Prostate carcinoma	CXCL16	Q9H2A7	C-X-C motif chemokine ligand 16	Signaling
Prostate carcinoma	LGR6	Q9HBX8	leucine rich repeat containing G protein-coupled receptor 6	G-protein coupled receptor
Prostate carcinoma	BDNF	P23560	brain derived neurotrophic factor	Signaling
Prostate carcinoma	CXCL5	P42830	C-X-C motif chemokine ligand 5	Signaling
Prostate carcinoma	CYP3A43	Q9HB55	cytochrome P450 family 3 subfamily A member 43	Enzyme
Prostate carcinoma	SOAT1	P35610	sterol O-acyltransferase 1	Enzyme
Prostate carcinoma	BRAF	P15056	B-Raf proto-oncogene, serine/threonine kinase	Kinase
Prostate carcinoma	STAT6	P42226	signal transducer and activator of transcription 6	Nucleic acid binding
Prostate carcinoma	STK11	Q15831	serine/threonine kinase 11	Kinase
Prostate carcinoma	TAC1	P20366	tachykinin precursor 1
Prostate carcinoma	TFF1	P04155	trefoil factor 1	Signaling
Prostate carcinoma	TGFBR1	P36897	transforming growth factor beta receptor 1	Kinase
Prostate carcinoma	TOP2A	P11388	DNA topoisomerase II alpha
Prostate carcinoma	TXN	P10599	thioredoxin
Prostate carcinoma	BTG2	P78543	BTG anti-proliferation factor 2
Prostate carcinoma	HMGN5	P82970	high mobility group nucleosome binding domain 5
Prostate carcinoma	CALM1	P0DP23;P0DP24;P0DP25	calmodulin 1	Calcium-binding protein
Prostate carcinoma	CALM2	P0DP23;P0DP24;P0DP25	calmodulin 2	Calcium-binding protein
Prostate carcinoma	CALM3	P0DP23;P0DP24;P0DP25	calmodulin 3	Calcium-binding protein
Prostate carcinoma	FZD4	Q9ULV1	frizzled class receptor 4	G-protein coupled receptor
Prostate carcinoma	UXT	Q9UBK9	ubiquitously expressed prefoldin like chaperone
Prostate carcinoma	SPHK1	Q9NYA1	sphingosine kinase 1	Kinase
Prostate carcinoma	NAT1	P18440	N-acetyltransferase 1	Enzyme
Prostate carcinoma	XPR1	Q9UBH6	xenotropic and polytropic retrovirus receptor 1	Transporter
Prostate carcinoma	PAGE4	O60829	PAGE family member 4
Prostate carcinoma	AKAP12	Q02952	A-kinase anchoring protein 12
Prostate carcinoma	NCOR2	Q9Y618	nuclear receptor corepressor 2	Transcription factor
Prostate carcinoma	CD151	P48509	CD151 molecule (Raph blood group)
Prostate carcinoma	ZEB2	O60315	zinc finger E-box binding homeobox 2	Transcription factor
Prostate carcinoma	LINC01672		long intergenic non-protein coding RNA 1672
Prostate carcinoma	COMMD3-BMI1	P35226	COMMD3-BMI1 readthrough
Prostate carcinoma	CDK9	P50750	cyclin dependent kinase 9	Kinase
Prostate carcinoma	TLR6	Q9Y2C9	toll like receptor 6
Prostate carcinoma	FST	P19883	follistatin	Enzyme modulator
Prostate carcinoma	CEACAM5	P06731	CEA cell adhesion molecule 5
Prostate carcinoma	SEMA3C	Q99985	semaphorin 3C	Signaling
Prostate carcinoma	IFI44	Q8TCB0	interferon induced protein 44
Prostate carcinoma	TXNIP	Q9H3M7	thioredoxin interacting protein
Prostate carcinoma	SUB1	P53999	SUB1 regulator of transcription
Prostate carcinoma	PIM2	Q9P1W9	Pim-2 proto-oncogene, serine/threonine kinase	Kinase
Prostate carcinoma	LOC110806263		TERT 5' regulatory region
Prostate carcinoma	CHKA	P35790	choline kinase alpha	Kinase
Prostate carcinoma	CHRM3	P20309	cholinergic receptor muscarinic 3	G-protein coupled receptor
Prostate carcinoma	H3P33		H3 histone pseudogene 33
Prostate carcinoma	ADCYAP1	P18509	adenylate cyclase activating polypeptide 1	Signaling
Prostate carcinoma	MRGPRX3	Q96LB0	MAS related GPR family member X3	G-protein coupled receptor
Prostate carcinoma	MRGPRX4	Q96LA9	MAS related GPR family member X4	G-protein coupled receptor
Prostate carcinoma	PRAP1	Q96NZ9	proline rich acidic protein 1
Prostate carcinoma	GPR151	Q8TDV0	G protein-coupled receptor 151	G-protein coupled receptor
Prostate carcinoma	OR51E1	Q8TCB6	olfactory receptor family 51 subfamily E member 1	G-protein coupled receptor
Prostate carcinoma	VCAN	P13611	versican	Extracellular structure
Prostate carcinoma	CTSK	P43235	cathepsin K	Enzyme
Prostate carcinoma	CYP2D6	P10635	cytochrome P450 family 2 subfamily D member 6
Prostate carcinoma	DAB2	P98082	DAB adaptor protein 2	Signaling
Prostate carcinoma	DCN	P07585	decorin
Prostate carcinoma	AKR1C2	P52895	aldo-keto reductase family 1 member C2	Enzyme
Prostate carcinoma	DDIT3	P35638	DNA damage inducible transcript 3
Prostate carcinoma	DDX5	P17844	DEAD-box helicase 5
Prostate carcinoma	ATN1	P54259	atrophin 1
Prostate carcinoma	E2F5	Q15329	E2F transcription factor 5	Nucleic acid binding
Prostate carcinoma	ABCA1	O95477	ATP binding cassette subfamily A member 1	Transporter
Prostate carcinoma	EDNRB	P24530	endothelin receptor type B	G-protein coupled receptor
Prostate carcinoma	EEF1A1	P68104	eukaryotic translation elongation factor 1 alpha 1	Enzyme
Prostate carcinoma	ELK4	P28324	ETS transcription factor ELK4	Transcription factor
Prostate carcinoma	PRSS55	Q6UWB4	serine protease 55	Enzyme
Prostate carcinoma	ERCC1	P07992	ERCC excision repair 1, endonuclease non-catalytic subunit	Enzyme
Prostate carcinoma	ALB	P02768	albumin	Transporter
Prostate carcinoma	ALKBH3	Q96Q83	alkB homolog 3, alpha-ketoglutaratedependent dioxygenase
Prostate carcinoma	FER	P16591	FER tyrosine kinase	Kinase
Prostate carcinoma	ZHX2	Q9Y6X8	zinc fingers and homeoboxes 2	Transcription factor
Prostate carcinoma	FKBP5	Q13451	FKBP prolyl isomerase 5	Enzyme
Prostate carcinoma	MMRN1	Q13201	multimerin 1
Prostate carcinoma	PEG10	Q86TG7	paternally expressed 10
Prostate carcinoma	FLNA	P21333	filamin A
Prostate carcinoma	FLT4	P35916	fms related receptor tyrosine kinase 4	Kinase
Prostate carcinoma	SRRM2	Q9UQ35	serine/arginine repetitive matrix 2
Prostate carcinoma	ALOX5	P09917	arachidonate 5-lipoxygenase	Enzyme
Prostate carcinoma	KLK5	Q9Y337	kallikrein related peptidase 5	Enzyme
Prostate carcinoma	MRGPRX1	Q96LB2	MAS related GPR family member X1	G-protein coupled receptor
Prostate carcinoma	GLB1	P16278	galactosidase beta 1	Enzyme
Prostate carcinoma	PDCD4	Q53EL6	programmed cell death 4	Nucleic acid binding
Prostate carcinoma	RBMS3	Q6XE24	RNA binding motif single stranded interacting protein 3
Prostate carcinoma	SGSM3	Q96HU1	small G protein signaling modulator 3	Enzyme
Prostate carcinoma	GPC1	P35052	glypican 1
Prostate carcinoma	UTS2R	Q9UKP6	urotensin 2 receptor	G-protein coupled receptor
Prostate carcinoma	ANGPT1	Q15389	angiopoietin 1	Signaling
Prostate carcinoma	ANGPT2	O15123	angiopoietin 2	Signaling
Prostate carcinoma	GPER1	Q99527	G protein-coupled estrogen receptor 1	G-protein coupled receptor
Prostate carcinoma	GRN	P28799	granulin precursor
Prostate carcinoma	CERS2	Q96G23	ceramide synthase 2
Prostate carcinoma	H2AZ1	P0C0S5	H2A.Z variant histone 1
Prostate carcinoma	HK2	P52789	hexokinase 2	Kinase
Prostate carcinoma	HLA-DRB1	P01911	major histocompatibility complex, class II, DR beta 1	Immune response
Prostate carcinoma	HMGA1	P17096	high mobility group AT-hook 1	Nucleic acid binding
Prostate carcinoma	HMMR	O75330	hyaluronan mediated motility receptor
Prostate carcinoma	HNRNPK	P61978	heterogeneous nuclear ribonucleoprotein K	Enzyme
Prostate carcinoma	HP	P00738	haptoglobin	Enzyme
Prostate carcinoma	HYAL1	Q12794	hyaluronidase 1	Enzyme
Prostate carcinoma	APOE	P02649	apolipoprotein E
Prostate carcinoma	IRS1	P35568	insulin receptor substrate 1
Prostate carcinoma	ITGAV	P06756	integrin subunit alpha V
Prostate carcinoma	KCNH2	Q12809	potassium voltage-gated channel subfamily H member 2	Ion channel
Prostate carcinoma	LEPR	P48357	leptin receptor	Signaling
Prostate carcinoma	LRP1	Q07954	LDL receptor related protein 1
Prostate carcinoma	MIR126		microRNA 126
Prostate carcinoma	MIR130B		microRNA 130b
Prostate carcinoma	MIR139		microRNA 139
Prostate carcinoma	MIR150		microRNA 150
Prostate carcinoma	MIR154		microRNA 154
Prostate carcinoma	MIR155		microRNA 155
Prostate carcinoma	MIR214		microRNA 214
Prostate carcinoma	MIR223		microRNA 223
Prostate carcinoma	MIR29B1		microRNA 29b-1
Prostate carcinoma	MIR29B2		microRNA 29b-2
Prostate carcinoma	MIR93		microRNA 93
Prostate carcinoma	CD46	P15529	CD46 molecule
Prostate carcinoma	MDK	P21741	midkine	Signaling
Prostate carcinoma	ABCC1	P33527	ATP binding cassette subfamily C member 1	Transporter
Prostate carcinoma	GPR166P		G protein-coupled receptor 166 pseudogene
Prostate carcinoma	MYH6	P13533	myosin heavy chain 6
Prostate carcinoma	NGFR	P08138	nerve growth factor receptor	Receptor
Prostate carcinoma	NPY	P01303	neuropeptide Y	Signaling
Prostate carcinoma	NOTCH3	Q9UM47	notch receptor 3
Prostate carcinoma	NPAS2	Q99743	neuronal PAS domain protein 2
Prostate carcinoma	MIR378A		microRNA 378a
Prostate carcinoma	PAK1	Q13153	p21 (RAC1) activated kinase 1	Kinase
Prostate carcinoma	ANO7	Q6IWH7	anoctamin 7
Prostate carcinoma	PAX2	Q02962	paired box 2
Prostate carcinoma	ADIPOR1	Q96A54	adiponectin receptor 1	Receptor
Prostate carcinoma	PECAM1	P16284	platelet and endothelial cell adhesion molecule 1	Cell adhesion
Prostate carcinoma	PIK3R1	P27986	phosphoinositide-3-kinase regulatory subunit 1	Kinase
Prostate carcinoma	PLA2G2A	P14555	phospholipase A2 group IIA	Enzyme
Prostate carcinoma	IL17D	Q8TAD2	interleukin 17D
Prostate carcinoma	UGT1A1	P22309	UDP glucuronosyltransferase family 1 member A1
Prostate carcinoma	MED1	Q15648	mediator complex subunit 1
Prostate carcinoma	TET2	Q6N021	tet methylcytosine dioxygenase 2
Prostate carcinoma	TRPM7	Q96QT4	transient receptor potential cation channel subfamily M member 7	Ion channel
Prostate carcinoma	TUG1		taurine up-regulated 1
Prostate carcinoma	PPT1	P50897	palmitoyl-protein thioesterase 1	Enzyme
Prostate carcinoma	KDM3A	Q9Y4C1	lysine demethylase 3A	Epigenetic regulator
Prostate carcinoma	PNO1	Q9NRX1	partner of NOB1 homolog
Prostate carcinoma	PTBP1	P26599	polypyrimidine tract binding protein 1
Prostate carcinoma	PTGS1	P23219	prostaglandin-endoperoxide synthase 1	Enzyme
Prostate carcinoma	PTK6	Q13882	protein tyrosine kinase 6	Kinase
Prostate carcinoma	BAX	Q07812	BCL2 associated X, apoptosis regulator	Signaling
Prostate carcinoma	REST	Q13127	RE1 silencing transcription factor	Transcription factor
Prostate carcinoma	BLM	P54132	BLM RecQ like helicase
Prostate carcinoma	SET	Q01105	SET nuclear proto-oncogene	Enzyme modulator
Prostate carcinoma	SIAH2	O43255	siah E3 ubiquitin protein ligase 2
Prostate carcinoma	SLPI	P03973	secretory leukocyte peptidase inhibitor	Enzyme modulator
Prostate carcinoma	SMARCA4	P51532	SWI/SNF related, matrix associated, actin dependent regulator of chromatin, subfamily a, member 4	Epigenetic regulator
Prostate carcinoma	SOD1	P00441	superoxide dismutase 1	Enzyme
Prostate carcinoma	SRD5A1	P18405	steroid 5 alpha-reductase 1	Enzyme
Prostate carcinoma	SRY	Q05066	sex determining region Y	Transcription factor
Prostate carcinoma	SSTR2	P30874	somatostatin receptor 2	G-protein coupled receptor
Prostate carcinoma	SULT1E1	P49888	sulfotransferase family 1E member 1
Prostate carcinoma	SULT2A1	Q06520	sulfotransferase family 2A member 1
Prostate carcinoma	THY1	P04216	Thy-1 cell surface antigen
Prostate carcinoma	TPT1	P13693	tumor protein, translationally-controlled 1	Cellular structure
Prostate carcinoma	NR1H2	P55055	nuclear receptor subfamily 1 group H member 2	Nuclear receptor
Prostate carcinoma	XRCC3	O43542	X-ray repair cross complementing 3
Prostate carcinoma	CA9	Q16790	carbonic anhydrase 9
Prostate carcinoma	WDR77	Q9BQA1	WD repeat domain 77
Prostate carcinoma	NOX5	Q96PH1	NADPH oxidase 5
Prostate carcinoma	TFPI2	P48307	tissue factor pathway inhibitor 2	Enzyme modulator
Prostate carcinoma	CD276	Q5ZPR3	CD276 molecule	Enzyme modulator
Prostate carcinoma	HMGA2	P52926	high mobility group AT-hook 2	Nucleic acid binding
Prostate carcinoma	MLRL		Myeloid leukemia-related gene (myeloid tumor suppressor)
Prostate carcinoma	USP9X	Q93008	ubiquitin specific peptidase 9 X-linked
Prostate carcinoma	CASP1	P29466	caspase 1	Enzyme
Prostate carcinoma	CASP7	P55210	caspase 7	Enzyme
Prostate carcinoma	NR0B2	Q15466	nuclear receptor subfamily 0 group B member 2	Nuclear receptor
Prostate carcinoma	RECK	O95980	reversion inducing cysteine rich protein with kazal motifs	Enzyme modulator
Prostate carcinoma	PROK1	P58294	prokineticin 1	Signaling
Prostate carcinoma	MAK16	Q9BXY0	MAK16 homolog
Prostate carcinoma	RUNX3	Q13761	RUNX family transcription factor 3	Transcription factor
Prostate carcinoma	SOCS1	O15524	suppressor of cytokine signaling 1	Enzyme modulator
Prostate carcinoma	IRS2	Q9Y4H2	insulin receptor substrate 2
Prostate carcinoma	EIF3H	O15372	eukaryotic translation initiation factor 3 subunit H	Enzyme
Prostate carcinoma	TNFRSF10A	O00220	TNF receptor superfamily member 10a
Prostate carcinoma	TRIM24	O15164	tripartite motif containing 24
Prostate carcinoma	SOCS2	O14508	suppressor of cytokine signaling 2	Enzyme modulator
Prostate carcinoma	ARHGEF7	Q14155	Rho guanine nucleotide exchange factor 7
Prostate carcinoma	CCNB1	P14635	cyclin B1	Enzyme modulator
Prostate carcinoma	CD163	Q86VB7	CD163 molecule	Enzyme
Prostate carcinoma	ABCG2	Q9UNQ0	ATP binding cassette subfamily G member 2 (Junior blood group)	Transporter
Prostate carcinoma	GREB1	Q4ZG55	growth regulating estrogen receptor binding 1
Prostate carcinoma	CDC25C	P30307	cell division cycle 25C	Enzyme
Prostate carcinoma	MIR708		microRNA 708
Prostate carcinoma	HDAC6	Q9UBN7	histone deacetylase 6	Epigenetic regulator
Prostate carcinoma	TSPY10	P0CV98;P0CW01;Q01534	testis specific protein Y-linked 10
Prostate carcinoma	HOTTIP		HOXA distal transcript antisense RNA
Prostate carcinoma	MIR466		microRNA 466
Prostate carcinoma	TNK2	Q07912	tyrosine kinase non receptor 2	Kinase
Prostate carcinoma	PCAT14		prostate cancer associated transcript 14
Prostate carcinoma	SPRY1	O43609	sprouty RTK signaling antagonist 1	Signaling
Prostate carcinoma	ABCC4	O15439	ATP binding cassette subfamily C member 4	Transporter
Prostate carcinoma	PAK4	O96013	p21 (RAC1) activated kinase 4	Kinase
Prostate carcinoma	CDKN3	Q16667	cyclin dependent kinase inhibitor 3
Prostate carcinoma	DLC1	Q96QB1	DLC1 Rho GTPase activating protein
Prostate carcinoma	PRMT5	O14744	protein arginine methyltransferase 5	Epigenetic regulator
Prostate carcinoma	OLFM4	Q6UX06	olfactomedin 4	Cellular structure
Prostate carcinoma	CXCL13	O43927	C-X-C motif chemokine ligand 13	Signaling
Prostate carcinoma	TXNRD2	Q9NNW7	thioredoxin reductase 2	Enzyme
Prostate carcinoma	CFL1	P23528	cofilin 1
Prostate carcinoma	CFTR	P13569	CF transmembrane conductance regulator	Ion channel
Prostate carcinoma	LYVE1	Q9Y5Y7	lymphatic vessel endothelial hyaluronan receptor 1
Prostate carcinoma	FSTL1	Q12841	follistatin like 1	Enzyme modulator
Prostate carcinoma	CISH	Q9NSE2	cytokine inducible SH2 containing protein	Enzyme modulator
Prostate carcinoma	SERPINA3	P01011	serpin family A member 3	Enzyme modulator
Prostate carcinoma	CNR1	P21554	cannabinoid receptor 1	G-protein coupled receptor
Prostate carcinoma	CPT1A	P50416	carnitine palmitoyltransferase 1A	Enzyme
Prostate carcinoma	CSF1R	P07333	colony stimulating factor 1 receptor	Kinase
Prostate carcinoma	PWAR1		Prader Willi/Angelman region RNA 1
Prostate carcinoma	PDIK1L	Q8N165	PDLIM1 interacting kinase 1 like	Kinase
Prostate carcinoma	CTSD	P07339	cathepsin D	Enzyme
Prostate carcinoma	CTSZ	Q9UBR2	cathepsin Z	Enzyme
Prostate carcinoma	ADRB2	P07550	adrenoceptor beta 2	G-protein coupled receptor
Prostate carcinoma	CYP1A2	P05177	cytochrome P450 family 1 subfamily A member 2	Enzyme
Prostate carcinoma	CYP2E1	P05181	cytochrome P450 family 2 subfamily E member 1
Prostate carcinoma	CYP11A1	P05108	cytochrome P450 family 11 subfamily A member 1
Prostate carcinoma	PRUNE2	Q8WUY3	prune homolog 2 with BCH domain
Prostate carcinoma	CYP27A1	Q02318	cytochrome P450 family 27 subfamily A member 1	Enzyme
Prostate carcinoma	DAG1	Q14118	dystroglycan 1	Receptor
Prostate carcinoma	DCC	P43146	DCC netrin 1 receptor
Prostate carcinoma	GADD45A	P24522	growth arrest and DNA damage inducible alpha
Prostate carcinoma	DEFB1	P60022	defensin beta 1
Prostate carcinoma	DSPP	Q9NZW4	dentin sialophosphoprotein
Prostate carcinoma	ECE1	P42892	endothelin converting enzyme 1	Enzyme
Prostate carcinoma	A2M	P01023	alpha-2-macroglobulin	Enzyme modulator
Prostate carcinoma	ENG	P17813	endoglin
Prostate carcinoma	EPHX1	P07099	epoxide hydrolase 1
Prostate carcinoma	EPO	P01588	erythropoietin
Prostate carcinoma	ACSL3	O95573	acyl-CoA synthetase long chain family member 3	Enzyme
Prostate carcinoma	FAP	Q12884	fibroblast activation protein alpha	Enzyme
Prostate carcinoma	FGF1	P05230	fibroblast growth factor 1	Signaling
Prostate carcinoma	FGF13	Q92913	fibroblast growth factor 13	Signaling
Prostate carcinoma	FHL2	Q14192	four and a half LIM domains 2	Transcription factor
Prostate carcinoma	ELL2	O00472	elongation factor for RNA polymerase II 2	Cell-cell junction
Prostate carcinoma	KDM4B	O94953	lysine demethylase 4B	Epigenetic regulator
Prostate carcinoma	FLI1	Q01543	Fli-1 proto-oncogene, ETS transcription factor	Transcription factor
Prostate carcinoma	PHLPP1	O60346	PH domain and leucine rich repeat protein phosphatase 1	Epigenetic regulator
Prostate carcinoma	FTH1	P02794	ferritin heavy chain 1	Storage
Prostate carcinoma	ALPP	P05187	alkaline phosphatase, placental	Enzyme
Prostate carcinoma	XRCC6	P12956	X-ray repair cross complementing 6	Enzyme
Prostate carcinoma	TNFAIP8	O95379	TNF alpha induced protein 8
Prostate carcinoma	NOC2L	Q9Y3T9	NOC2 like nucleolar associated transcriptional repressor
Prostate carcinoma	EHF	Q9NZC4	ETS homologous factor	Transcription factor
Prostate carcinoma	GBX2	P52951	gastrulation brain homeobox 2	Transcription factor
Prostate carcinoma	AMELX	Q99217	amelogenin X-linked
Prostate carcinoma	GHR	P10912	growth hormone receptor	Signaling
Prostate carcinoma	FOXP1	Q9H334	forkhead box P1
Prostate carcinoma	GNMT	Q14749	glycine N-methyltransferase
Prostate carcinoma	GLO1	Q04760	glyoxalase I
Prostate carcinoma	GLS	O94925	glutaminase	Enzyme
Prostate carcinoma	GNAS	O95467;P63092;P84996;Q5JWF2	GNAS complex locus	Enzyme modulator
Prostate carcinoma	CXCR3	P49682	C-X-C motif chemokine receptor 3	G-protein coupled receptor
Prostate carcinoma	CTBP1-AS		CTBP1 antisense RNA
Prostate carcinoma	GIT1	Q9Y2X7	GIT ArfGAP 1
Prostate carcinoma	NOB1	Q9ULX3	NIN1 (RPN12) binding protein 1 homolog
Prostate carcinoma	GSN	P06396	gelsolin	Cellular structure
Prostate carcinoma	HADHB	P55084	hydroxyacyl-CoA dehydrogenase trifunctional multienzyme complex subunit beta	Enzyme
Prostate carcinoma	HDAC2	Q92769	histone deacetylase 2	Epigenetic regulator
Prostate carcinoma	ANXA6	P08133	annexin A6
Prostate carcinoma	HIC1	Q14526	HIC ZBTB transcriptional repressor 1	Transcription factor
Prostate carcinoma	AOX1	Q06278	aldehyde oxidase 1	Enzyme
Prostate carcinoma	HNF4A	P41235	hepatocyte nuclear factor 4 alpha	Nuclear receptor
Prostate carcinoma	HOXC8	P31273	homeobox C8
Prostate carcinoma	HPRT1	P00492	hypoxanthine phosphoribosyltransferase 1	Enzyme
Prostate carcinoma	HSPD1	P10809	heat shock protein family D (Hsp60) member 1
Prostate carcinoma	HSPG2	P98160	heparan sulfate proteoglycan 2	Enzyme modulator
Prostate carcinoma	ICA1	Q05084	islet cell autoantigen 1
Prostate carcinoma	IL7	P13232	interleukin 7
Prostate carcinoma	AQP3	Q92482	aquaporin 3 (Gill blood group)	Ion channel
Prostate carcinoma	IL17A	Q16552	interleukin 17A
Prostate carcinoma	ITGB1	P05556	integrin subunit beta 1	Receptor
Prostate carcinoma	KLK1	P06870	kallikrein 1	Enzyme
Prostate carcinoma	LDHA	P00338	lactate dehydrogenase A	Enzyme
Prostate carcinoma	LGALS8	O00214	galectin 8	Signaling
Prostate carcinoma	MIRLET7B		microRNA let-7b
Prostate carcinoma	MIR106A		microRNA 106a
Prostate carcinoma	MIR107		microRNA 107
Prostate carcinoma	MIR130A		microRNA 130a
Prostate carcinoma	MIR132		microRNA 132
Prostate carcinoma	MIR148A		microRNA 148a
Prostate carcinoma	MIR16-1		microRNA 16-1
Prostate carcinoma	MIR191		microRNA 191
Prostate carcinoma	MIR199A1		microRNA 199a-1
Prostate carcinoma	MIR199A2		microRNA 199a-2
Prostate carcinoma	MIR19A		microRNA 19a
Prostate carcinoma	MIR200A		microRNA 200a
Prostate carcinoma	MIR22		microRNA 22
Prostate carcinoma	MIR23A		microRNA 23a
Prostate carcinoma	MIR26B		microRNA 26b
Prostate carcinoma	MIR27B		microRNA 27b
Prostate carcinoma	MIR32		microRNA 32
Prostate carcinoma	MIR320A		microRNA 320a
Prostate carcinoma	MIR99A		microRNA 99a
Prostate carcinoma	ARRB2	P32121	arrestin beta 2	Enzyme modulator
Prostate carcinoma	MECP2	P51608	methyl-CpG binding protein 2	Epigenetic regulator
Prostate carcinoma	MIF	P14174	macrophage migration inhibitory factor
Prostate carcinoma	MMP13	P45452	matrix metallopeptidase 13	Enzyme
Prostate carcinoma	MMP16	P51512	matrix metallopeptidase 16	Enzyme
Prostate carcinoma	MRE11	P49959	MRE11 homolog, double strand break repair nuclease
Prostate carcinoma	KLK12	Q9UKR0	kallikrein related peptidase 12	Enzyme
Prostate carcinoma	MST1R	Q04912	macrophage stimulating 1 receptor	Kinase
Prostate carcinoma	MT2A	P02795	metallothionein 2A
Prostate carcinoma	MXI1	P50539	MAX interactor 1, dimerization protein	Transcription factor
Prostate carcinoma	NFATC1	O95644	nuclear factor of activated T cells 1	Transcription factor
Prostate carcinoma	NPM1	P06748	nucleophosmin 1	Chaperone
Prostate carcinoma	NUCB2	P80303	nucleobindin 2	Calcium-binding protein
Prostate carcinoma	OSM	P13725	oncostatin M	Signaling
Prostate carcinoma	P2RX7	Q99572	purinergic receptor P2X 7	Ion channel
Prostate carcinoma	PA2G4	Q9UQ80	proliferation-associated 2G4
Prostate carcinoma	NUSAP1	Q9BXS6	nucleolar and spindle associated protein 1
Prostate carcinoma	MZB1	Q8WU39	marginal zone B and B1 cell specific protein
Prostate carcinoma	TNFRSF12A	Q9NP84	TNF receptor superfamily member 12A
Prostate carcinoma	ZBTB7A	O95365	zinc finger and BTB domain containing 7A	Transcription factor
Prostate carcinoma	MPC1	Q9Y5U8	mitochondrial pyruvate carrier 1	Transporter
Prostate carcinoma	PIK3R2	O00459	phosphoinositide-3-kinase regulatory subunit 2	Enzyme modulator
Prostate carcinoma	PKD1	P98161	polycystin 1, transient receptor potential channel interacting
Prostate carcinoma	POLB	P06746	DNA polymerase beta	Enzyme
Prostate carcinoma	ING3	Q9NXR8	inhibitor of growth family member 3
Prostate carcinoma	PPARD	Q03181	peroxisome proliferator activated receptor delta	Nuclear receptor
Prostate carcinoma	XAF1	Q6GPH4	XIAP associated factor 1
Prostate carcinoma	ADI1	Q9BV57	acireductone dioxygenase 1	Enzyme
Prostate carcinoma	LGR4	Q9BXB1	leucine rich repeat containing G protein-coupled receptor 4	G-protein coupled receptor
Prostate carcinoma	PBK	Q96KB5	PDZ binding kinase	Kinase
Prostate carcinoma	PRKCZ	Q05513	protein kinase C zeta	Kinase
Prostate carcinoma	MAP2K5	Q13163	mitogen-activated protein kinase kinase 5	Kinase
Prostate carcinoma	PRLR	P16471	prolactin receptor	Signaling
Prostate carcinoma	LGMN	Q99538	legumain	Enzyme
Prostate carcinoma	KLK10	O43240	kallikrein related peptidase 10	Enzyme
Prostate carcinoma	MIR499A		microRNA 499a
Prostate carcinoma	WFDC1	Q9HC57	WAP four-disulfide core domain 1
Prostate carcinoma	RAC3	P60763	Rac family small GTPase 3	Enzyme modulator
Prostate carcinoma	RAP1A	P62834	RAP1A, member of RAS oncogene family	Enzyme modulator
Prostate carcinoma	RASGRF1	Q13972	Ras protein specific guanine nucleotide releasing factor 1	Enzyme modulator
Prostate carcinoma	RBM3	P98179	RNA binding motif protein 3	Nucleic acid binding
Prostate carcinoma	MBOAT4	Q96T53	membrane bound O-acyltransferase domain containing 4
Prostate carcinoma	RRAS	P10301	RAS related	Enzyme modulator
Prostate carcinoma	SCD	O00767	stearoyl-CoA desaturase
Prostate carcinoma	CEACAM1	P13688	CEA cell adhesion molecule 1
Prostate carcinoma	CX3CL1	P78423	C-X3-C motif chemokine ligand 1	Signaling
Prostate carcinoma	SELE	P16581	selectin E
Prostate carcinoma	SFRP4	Q6FHJ7	secreted frizzled related protein 4
Prostate carcinoma	SIM2	Q14190	SIM bHLH transcription factor 2	Transcription factor
Prostate carcinoma	UCA1		urothelial cancer associated 1
Prostate carcinoma	SOD3	P08294	superoxide dismutase 3	Enzyme
Prostate carcinoma	SOS1	Q07889	SOS Ras/Rac guanine nucleotide exchange factor 1	Enzyme modulator
Prostate carcinoma	SPG7	Q9UQ90	SPG7 matrix AAA peptidase subunit, paraplegin	Enzyme
Prostate carcinoma	SPOCK1	Q08629	SPARC (osteonectin), cwcv and kazal like domains proteoglycan 1	Enzyme modulator
Prostate carcinoma	SREBF2	Q12772	sterol regulatory element binding transcription factor 2
Prostate carcinoma	SSTR1	P30872	somatostatin receptor 1	G-protein coupled receptor
Prostate carcinoma	SSX2	Q16385	SSX family member 2	Nucleic acid binding
Prostate carcinoma	SULT1A1	P50225	sulfotransferase family 1A member 1
Prostate carcinoma	ADAM17	P78536	ADAM metallopeptidase domain 17
Prostate carcinoma	BTF3P11		basic transcription factor 3 pseudogene 11
Prostate carcinoma	PRDX2	P32119	peroxiredoxin 2	Enzyme
Prostate carcinoma	TFPI	P10646	tissue factor pathway inhibitor	Enzyme modulator
Prostate carcinoma	TGFB3	P10600	transforming growth factor beta 3	Signaling
Prostate carcinoma	TGM2	P21980	transglutaminase 2	Enzyme
Prostate carcinoma	TSPO	P30536	translocator protein
Prostate carcinoma	TLR1	Q15399	toll like receptor 1
Prostate carcinoma	TP53BP1	Q12888	tumor protein p53 binding protein 1	Epigenetic regulator
Prostate carcinoma	CRISP2	P16562	cysteine rich secretory protein 2	Immune response
Prostate carcinoma	TSG101	Q99816	tumor susceptibility 101	Enzyme
Prostate carcinoma	TSPY1	P0CV98;P0CW01;Q01534	testis specific protein Y-linked 1	Enzyme modulator
Prostate carcinoma	TSPY3	P0CV98;P0CW01;Q01534	testis specific protein Y-linked 3
Prostate carcinoma	UBE3A	Q05086	ubiquitin protein ligase E3A
Prostate carcinoma	TRPV1	Q8NER1	transient receptor potential cation channel subfamily V member 1	Ion channel
Prostate carcinoma	WNT11	O96014	Wnt family member 11	Signaling
Prostate carcinoma	XPO1	O14980	exportin 1	Receptor
Prostate carcinoma	ZFP36	P26651	ZFP36 ring finger protein	Nucleic acid binding
Prostate carcinoma	USP7	Q93009	ubiquitin specific peptidase 7	Enzyme
Prostate carcinoma	SLC52A2	Q9HAB3	solute carrier family 52 member 2	Transporter
Prostate carcinoma	STEAP4	Q687X5	STEAP4 metalloreductase
Prostate carcinoma	LIN28A	Q9H9Z2	lin-28 homolog A	Nucleic acid binding
Prostate carcinoma	DHDDS	Q86SQ9	dehydrodolichyl diphosphate synthase subunit	Enzyme
Prostate carcinoma	FOSL1	P15407	FOS like 1, AP-1 transcription factor subunit	Transcription factor
Prostate carcinoma	SETD7	Q8WTS6	SET domain containing 7, histone lysine methyltransferase	Epigenetic regulator
Prostate carcinoma	SLC7A5	Q01650	solute carrier family 7 member 5	Transporter
Prostate carcinoma	KDM5D	Q9BY66	lysine demethylase 5D	Transcription factor
Prostate carcinoma	CAPZB	P47756	capping actin protein of muscle Z-line subunit beta	Cellular structure
Prostate carcinoma	SESN2	P58004	sestrin 2	Enzyme
Prostate carcinoma	MIEN1	Q9BRT3	migration and invasion enhancer 1
Prostate carcinoma	PRAC1	Q96KF2	PRAC1 small nuclear protein
Prostate carcinoma	SRRM4	A7MD48	serine/arginine repetitive matrix 4
Prostate carcinoma	SPZ1	Q9BXG8	spermatogenic leucine zipper 1
Prostate carcinoma	HAVCR2	Q8TDQ0	hepatitis A virus cellular receptor 2
Prostate carcinoma	SLC43A1	O75387	solute carrier family 43 member 1	Transporter
Prostate carcinoma	PIAS1	O75925	protein inhibitor of activated STAT 1
Prostate carcinoma	PDLIM4	P50479	PDZ and LIM domain 4	Cellular structure
Prostate carcinoma	RUNX1	Q01196	RUNX family transcription factor 1	Transcription factor
Prostate carcinoma	CDK5R1	Q15078	cyclin dependent kinase 5 regulatory subunit 1	Enzyme modulator
Prostate carcinoma	CCNA1	P78396	cyclin A1	Enzyme modulator
Prostate carcinoma	RGN	Q15493	regucalcin	Enzyme
Prostate carcinoma	SLC16A4	O15374	solute carrier family 16 member 4	Transporter
Prostate carcinoma	SLC16A3	O15427	solute carrier family 16 member 3	Transporter
Prostate carcinoma	NOG	Q13253	noggin
Prostate carcinoma	CLOCK	O15516	clock circadian regulator
Prostate carcinoma	CD40	P25942	CD40 molecule
Prostate carcinoma	CD40LG	P29965	CD40 ligand	Signaling
Prostate carcinoma	MTSS1	O43312	MTSS I-BAR domain containing 1	Cellular structure
Prostate carcinoma	MED12	Q93074	mediator complex subunit 12	Transcription factor
Prostate carcinoma	CDH2	P19022	cadherin 2
Prostate carcinoma	AKT3	Q9Y243	AKT serine/threonine kinase 3	Kinase
Prostate carcinoma	MIR888		microRNA 888
Prostate carcinoma	MIR1301		microRNA 1301
Prostate carcinoma	PARP2	Q9UGN5	poly(ADP-ribose) polymerase 2
Prostate carcinoma	MIR2909		microRNA 2909
Prostate carcinoma	HUWE1	Q7Z6Z7	HECT, UBA and WWE domain containing E3 ubiquitin protein ligase 1	Enzyme
Prostate carcinoma	LINC-ROR		long intergenic non-protein coding RNA, regulator of reprogramming
Prostate carcinoma	PGR-AS1		PGR antisense RNA 1
Prostate carcinoma	TRAP1	Q12931	TNF receptor associated protein 1	Chaperone
Prostate carcinoma	RBM5	P52756	RNA binding motif protein 5
Prostate carcinoma	ADAM10	O14672	ADAM metallopeptidase domain 10
Prostate carcinoma	TRIM13	O60858	tripartite motif containing 13
Prostate carcinoma	CDK7	P50613	cyclin dependent kinase 7	Kinase
Prostate carcinoma	TRIB1	Q96RU8	tribbles pseudokinase 1	Kinase
Prostate carcinoma	CDK8	P49336	cyclin dependent kinase 8	Kinase
Prostate carcinoma	CDK2AP2	O75956	cyclin dependent kinase 2 associated protein 2	Enzyme modulator
Prostate carcinoma	CDKN2B	P42772	cyclin dependent kinase inhibitor 2B
Prostate carcinoma	LANCL1	O43813	LanC like 1
Prostate carcinoma	AKR1A1	P14550	aldo-keto reductase family 1 member A1	Enzyme
Prostate carcinoma	TUBB3	Q13509	tubulin beta 3 class III	Cellular structure
Prostate carcinoma	CAP1	Q01518	cyclase associated actin cytoskeleton regulatory protein 1	Cellular structure
Prostate carcinoma	CARM1	Q86X55	coactivator associated arginine methyltransferase 1	Epigenetic regulator
Prostate carcinoma	CEBPB	P17676	CCAAT enhancer binding protein beta	Transcription factor
Prostate carcinoma	GNA13	Q14344	G protein subunit alpha 13	Enzyme modulator
Prostate carcinoma	POLD3	Q15054	DNA polymerase delta 3, accessory subunit
Prostate carcinoma	PTGES3	Q15185	prostaglandin E synthase 3	Chaperone
Prostate carcinoma	PLAC1	Q9HBJ0	placenta enriched 1
Prostate carcinoma	LILRB1	Q8NHL6	leukocyte immunoglobulin like receptor B1	Receptor
Prostate carcinoma	SMR3B	P02814	submaxillary gland androgen regulated protein 3B
Prostate carcinoma	GADD45G	O95257	growth arrest and DNA damage inducible gamma
Prostate carcinoma	PRDX3	P30048	peroxiredoxin 3	Enzyme
Prostate carcinoma	TMED10	P49755	transmembrane p24 trafficking protein 10	Transporter
Prostate carcinoma	WWP1	Q9H0M0	WW domain containing E3 ubiquitin protein ligase 1	Enzyme
Prostate carcinoma	WDR5	P61964	WD repeat domain 5
Prostate carcinoma	RPP14	O95059	ribonuclease P/MRP subunit p14
Prostate carcinoma	ZWINT	O95229	ZW10 interacting kinetochore protein
Prostate carcinoma	CDC37	Q16543	cell division cycle 37	Enzyme modulator
Prostate carcinoma	PTP4A3	O75365	protein tyrosine phosphatase 4A3
Prostate carcinoma	CHI3L1	P36222	chitinase 3 like 1
Prostate carcinoma	BAZ2A	Q9UIF9	bromodomain adjacent to zinc finger domain 2A
Prostate carcinoma	LINC02605		long intergenic non-protein coding RNA 2605
Prostate carcinoma	PARK7	Q99497	Parkinsonism associated deglycase	Enzyme
Prostate carcinoma	CBX3	Q13185	chromobox 3	Epigenetic regulator
Prostate carcinoma	H3P8		H3 histone pseudogene 8
Prostate carcinoma	H3P17		H3 histone pseudogene 17
Prostate carcinoma	ARL11	Q969Q4	ADP ribosylation factor like GTPase 11
Prostate carcinoma	AGAP2	Q99490	ArfGAP with GTPase domain, ankyrin repeat and PH domain 2
Prostate carcinoma	DCD	P81605	dermcidin
Prostate carcinoma	H4-16	P62805	H4 histone 16	Nucleic acid binding
Prostate carcinoma	CCR4	P51679	C-C motif chemokine receptor 4	G-protein coupled receptor
Prostate carcinoma	CCR6	P51684	C-C motif chemokine receptor 6	G-protein coupled receptor
Prostate carcinoma	MAP3K8	P41279	mitogen-activated protein kinase kinase kinase 8	Kinase
Prostate carcinoma	COX8A	P10176	cytochrome c oxidase subunit 8A	Enzyme
Prostate carcinoma	CLDN4	O14493	claudin 4	Cell-cell junction
Prostate carcinoma	CLDN3	O15551	claudin 3	Cell-cell junction
Prostate carcinoma	CLDN7	O95471	claudin 7	Cell-cell junction
Prostate carcinoma	CPOX	P36551	coproporphyrinogen oxidase	Enzyme
Prostate carcinoma	CPT2	P23786	carnitine palmitoyltransferase 2	Enzyme
Prostate carcinoma	CRAT	P43155	carnitine O-acetyltransferase	Enzyme
Prostate carcinoma	ATF2	P15336	activating transcription factor 2	Transcription factor
Prostate carcinoma	ZBTB46	Q86UZ6	zinc finger and BTB domain containing 46	Enzyme
Prostate carcinoma	NKX2-5	P52952	NK2 homeobox 5	Transcription factor
Prostate carcinoma	CTRL	P40313	chymotrypsin like	Enzyme
Prostate carcinoma	CXADR	P78310	CXADR Ig-like cell adhesion molecule
Prostate carcinoma	SLC2A12	Q8TD20	solute carrier family 2 member 12	Transporter
Prostate carcinoma	DDC	P20711	dopa decarboxylase
Prostate carcinoma	AGER	Q15109	advanced glycosylation end-product specific receptor	Receptor
Prostate carcinoma	DPEP1	P16444	dipeptidase 1
Prostate carcinoma	DPP4	P27487	dipeptidyl peptidase 4	Enzyme
Prostate carcinoma	LPAR1	Q92633	lysophosphatidic acid receptor 1	G-protein coupled receptor
Prostate carcinoma	CADM4	Q8NFZ8	cell adhesion molecule 4
Prostate carcinoma	CRYBG1	Q9Y4K1	crystallin beta-gamma domain containing 1
Prostate carcinoma	EPAS1	Q99814	endothelial PAS domain protein 1	Transcription factor
Prostate carcinoma	EPHB4	P54760	EPH receptor B4	Kinase
Prostate carcinoma	EPOR	P19235	erythropoietin receptor	Receptor
Prostate carcinoma	ESRRA	P11474	estrogen related receptor alpha	Nuclear receptor
Prostate carcinoma	ETV6	P41212	ETS variant transcription factor 6	Transcription factor
Prostate carcinoma	ALCAM	Q13740	activated leukocyte cell adhesion molecule	Cell adhesion
Prostate carcinoma	F2RL1	P55085	F2R like trypsin receptor 1	G-protein coupled receptor
Prostate carcinoma	FABP4	P15090	fatty acid binding protein 4
Prostate carcinoma	SPATA19	Q7Z5L4	spermatogenesis associated 19
Prostate carcinoma	ALDH1A3	P47895	aldehyde dehydrogenase 1 family member A3	Enzyme
Prostate carcinoma	EFEMP1	Q12805	EGF containing fibulin extracellular matrix protein 1	Extracellular structure
Prostate carcinoma	FDPS	P14324	farnesyl diphosphate synthase	Enzyme
Prostate carcinoma	FOXC1	Q12948	forkhead box C1	Transcription factor
Prostate carcinoma	TPX2	Q9ULW0	TPX2 microtubule nucleation factor	Cellular structure
Prostate carcinoma	FOXC2	Q99958	forkhead box C2	Transcription factor
Prostate carcinoma	KDM4C	Q9H3R0	lysine demethylase 4C
Prostate carcinoma	PHF8	Q9UPP1	PHD finger protein 8
Prostate carcinoma	PPP1R13B	Q96KQ4	protein phosphatase 1 regulatory subunit 13B	Enzyme modulator
Prostate carcinoma	CBX5	P45973	chromobox 5	Epigenetic regulator
Prostate carcinoma	ALPI	P09923	alkaline phosphatase, intestinal	Enzyme
Prostate carcinoma	FUS	P35637	FUS RNA binding protein	Nucleic acid binding
Prostate carcinoma	FUT4	P22083	fucosyltransferase 4	Enzyme
Prostate carcinoma	RICTOR	Q6R327	RPTOR independent companion of MTOR complex 2
Prostate carcinoma	FYN	P06241	FYN proto-oncogene, Src family tyrosine kinase	Kinase
Prostate carcinoma	GNL3	Q9BVP2	G protein nucleolar 3
Prostate carcinoma	LATS2	Q9NRM7	large tumor suppressor kinase 2	Kinase
Prostate carcinoma	GDF2	Q9UK05	growth differentiation factor 2	Signaling
Prostate carcinoma	GDNF	P39905	glial cell derived neurotrophic factor	Signaling
Prostate carcinoma	GFI1	Q99684	growth factor independent 1 transcriptional repressor	Transcription factor
Prostate carcinoma	GHSR	Q92847	growth hormone secretagogue receptor	G-protein coupled receptor
Prostate carcinoma	NOX1	Q9Y5S8	NADPH oxidase 1
Prostate carcinoma	LAT	O43561	linker for activation of T cells
Prostate carcinoma	PELP1	Q8IZL8	proline, glutamate and leucine rich protein 1
Prostate carcinoma	AGO2	Q9UKV8	argonaute RISC catalytic component 2
Prostate carcinoma	BHLHE22	Q8NFJ8	basic helix-loop-helix family member e22	Enzyme
Prostate carcinoma	ABO	P16442	ABO, alpha 1-3-N-acetylgalactosaminyltransferase and alpha 1-3-galactosyltransferase	Enzyme
Prostate carcinoma	CAVIN1	Q6NZI2	caveolae associated protein 1	Transcription factor
Prostate carcinoma	TMED10P1		transmembrane p24 trafficking protein 10 pseudogene 1
Prostate carcinoma	TRIM59	Q8IWR1	tripartite motif containing 59
Prostate carcinoma	LAMTOR2	Q9Y2Q5	late endosomal/lysosomal adaptor, MAPK and MTOR activator 2
Prostate carcinoma	MYLIP	Q8WY64	myosin regulatory light chain interacting protein
Prostate carcinoma	RACGAP1	Q9H0H5	Rac GTPase activating protein 1	Enzyme modulator
Prostate carcinoma	UHRF1	Q96T88	ubiquitin like with PHD and ring finger domains 1
Prostate carcinoma	GSTA1	P08263	glutathione S-transferase alpha 1
Prostate carcinoma	GSTM3	P21266	glutathione S-transferase mu 3
Prostate carcinoma	H1-0	P07305	H1.0 linker histone	Nucleic acid binding
Prostate carcinoma	H2AX	P16104	H2A.X variant histone	Nucleic acid binding
Prostate carcinoma	ANXA3	P12429	annexin A3
Prostate carcinoma	HDGF	P51858	heparin binding growth factor	Signaling
Prostate carcinoma	ACACA	Q13085	acetyl-CoA carboxylase alpha
Prostate carcinoma	HMGCR	P04035	3-hydroxy-3-methylglutaryl-CoA reductase
Prostate carcinoma	NR4A1	P22736	nuclear receptor subfamily 4 group A member 1	Nuclear receptor
Prostate carcinoma	FOXA2	Q9Y261	forkhead box A2	Transcription factor
Prostate carcinoma	HOXA10	P31260	homeobox A10
Prostate carcinoma	HOXA13	P31271	homeobox A13
Prostate carcinoma	HES1	Q14469	hes family bHLH transcription factor 1	Transcription factor
Prostate carcinoma	HSD17B2	P37059	hydroxysteroid 17-beta dehydrogenase 2	Enzyme
Prostate carcinoma	HSF1	Q00613	heat shock transcription factor 1	Transcription factor
Prostate carcinoma	BIRC5	O15392	baculoviral IAP repeat containing 5	Enzyme modulator
Prostate carcinoma	TNC	P24821	tenascin C
Prostate carcinoma	IAPP	P10997	islet amyloid polypeptide	Signaling
Prostate carcinoma	IFNA1	P01562	interferon alpha 1
Prostate carcinoma	IFNA13	P01562	interferon alpha 13
Prostate carcinoma	IGF2R	P11717	insulin like growth factor 2 receptor	Receptor
Prostate carcinoma	IL2RA	P01589	interleukin 2 receptor subunit alpha	Receptor
Prostate carcinoma	FASLG	P48023	Fas ligand	Signaling
Prostate carcinoma	IL2RB	P14784	interleukin 2 receptor subunit beta	Receptor
Prostate carcinoma	IL11	P20809	interleukin 11
Prostate carcinoma	IL13	P35225	interleukin 13
Prostate carcinoma	IL16	Q14005	interleukin 16	Signaling
Prostate carcinoma	IDO1	P14902	indoleamine 2,3-dioxygenase 1
Prostate carcinoma	ITGA6	P23229	integrin subunit alpha 6
Prostate carcinoma	ISG20	Q96AZ6	interferon stimulated exonuclease gene 20
Prostate carcinoma	ITGA5	P08648	integrin subunit alpha 5
Prostate carcinoma	ITK	Q08881	IL2 inducible T cell kinase	Kinase
Prostate carcinoma	KCNMA1	Q12791	potassium calcium-activated channel subfamily M alpha 1	Ion channel
Prostate carcinoma	KISS1	Q15726	KiSS-1 metastasis suppressor
Prostate carcinoma	KIT	P10721	KIT proto-oncogene, receptor tyrosine kinase	Kinase
Prostate carcinoma	KIF22	Q14807	kinesin family member 22	Cellular structure
Prostate carcinoma	KMT5A	Q9NQR1	lysine methyltransferase 5A
Prostate carcinoma	KRT19	P08727	keratin 19
Prostate carcinoma	RND3	P61587	Rho family GTPase 3	Enzyme modulator
Prostate carcinoma	LAMP2	P13473	lysosomal associated membrane protein 2	Transporter
Prostate carcinoma	RPSA	P08865	ribosomal protein SA	Nucleic acid binding
Prostate carcinoma	LASP1	Q14847	LIM and SH3 protein 1
Prostate carcinoma	LGALS3BP	Q08380	galectin 3 binding protein
Prostate carcinoma	LIFR	P42702	LIF receptor subunit alpha	Signaling
Prostate carcinoma	LIG4	P49917	DNA ligase 4
Prostate carcinoma	LIMK1	P53667	LIM domain kinase 1	Kinase
Prostate carcinoma	LMO2	P25791	LIM domain only 2
Prostate carcinoma	FENDRR		FOXF1 adjacent non-coding developmental regulatory RNA
Prostate carcinoma	LPA	P08519	lipoprotein(a)	Enzyme
Prostate carcinoma	LPL	P06858	lipoprotein lipase	Enzyme
Prostate carcinoma	LRP5	O75197	LDL receptor related protein 5
Prostate carcinoma	ARNT	P27540	aryl hydrocarbon receptor nuclear translocator	Transcription factor
Prostate carcinoma	MIR125A		microRNA 125a
Prostate carcinoma	MIR137		microRNA 137
Prostate carcinoma	MIR188		microRNA 188
Prostate carcinoma	MIR192		microRNA 192
Prostate carcinoma	MIR198		microRNA 198
Prostate carcinoma	MIR206		microRNA 206
Prostate carcinoma	ARR3	P36575	arrestin 3	Enzyme modulator
Prostate carcinoma	MIR30A		microRNA 30a
Prostate carcinoma	MIR33A		microRNA 33a
Prostate carcinoma	MIR17HG	Q75NE6	miR-17-92a-1 cluster host gene
Prostate carcinoma	SMAD1	Q15797	SMAD family member 1	Transcription factor
Prostate carcinoma	SMAD7	O15105	SMAD family member 7	Transcription factor
Prostate carcinoma	MAGEA3	P43357	MAGE family member A3	Cell adhesion
Prostate carcinoma	MAZ	P56270	MYC associated zinc finger protein
Prostate carcinoma	MCM7	P33993	minichromosome maintenance complex component 7	Enzyme
Prostate carcinoma	MEIS1	O00470	Meis homeobox 1	Enzyme
Prostate carcinoma	MEIS2	O14770	Meis homeobox 2	Enzyme
Prostate carcinoma	MAP3K1	Q13233	mitogen-activated protein kinase kinase kinase 1	Kinase
Prostate carcinoma	MIAT		myocardial infarction associated transcript
Prostate carcinoma	MIR330		microRNA 330
Prostate carcinoma	MIR335		microRNA 335
Prostate carcinoma	MIR338		microRNA 338
Prostate carcinoma	MT1A	P04731	metallothionein 1A
Prostate carcinoma	ATP6	P00846	ATP synthase F0 subunit 6	Transporter
Prostate carcinoma	PPP1R12A	O14974	protein phosphatase 1 regulatory subunit 12A
Prostate carcinoma	NCAM1	P13591	neural cell adhesion molecule 1
Prostate carcinoma	ACLY	P53396	ATP citrate lyase	Enzyme
Prostate carcinoma	DRG1	Q9Y295	developmentally regulated GTP binding protein 1
Prostate carcinoma	NEDD4	P46934	NEDD4 E3 ubiquitin protein ligase	Enzyme
Prostate carcinoma	NF2	P35240	neurofibromin 2
Prostate carcinoma	NHS	Q6T4R5	NHS actin remodeling regulator
Prostate carcinoma	NTRK2	Q16620	neurotrophic receptor tyrosine kinase 2	Kinase
Prostate carcinoma	MIR361		microRNA 361
Prostate carcinoma	MIR381		microRNA 381
Prostate carcinoma	MIR424		microRNA 424
Prostate carcinoma	MIR425		microRNA 425
Prostate carcinoma	OLR1	P78380	oxidized low density lipoprotein receptor 1
Prostate carcinoma	ALDH7A1	P49419	aldehyde dehydrogenase 7 family member A1	Enzyme
Prostate carcinoma	PBX1	P40424	PBX homeobox 1	Transcription factor
Prostate carcinoma	PCBP1	Q15365	poly(rC) binding protein 1	Enzyme
Prostate carcinoma	NDUFA13	Q9P0J0	NADH:ubiquinone oxidoreductase subunit A13	Enzyme
Prostate carcinoma	ING4	Q9UNL4	inhibitor of growth family member 4	Nucleic acid binding
Prostate carcinoma	SLC45A2	Q9UMX9	solute carrier family 45 member 2	Transporter
Prostate carcinoma	LINC00328		long intergenic non-protein coding RNA 328
Prostate carcinoma	ERGIC2	Q96RQ1	ERGIC and golgi 2
Prostate carcinoma	SCARA3	Q6AZY7	scavenger receptor class A member 3	Receptor
Prostate carcinoma	PDGFRA	P16234	platelet derived growth factor receptor alpha	Kinase
Prostate carcinoma	PDHA1	P08559	pyruvate dehydrogenase E1 subunit alpha 1
Prostate carcinoma	SF3B6	Q9Y3B4	splicing factor 3b subunit 6
Prostate carcinoma	ENPP1	P22413	ectonucleotide pyrophosphatase/phosphodiesterase 1	Enzyme
Prostate carcinoma	GHRL	Q9UBU3	ghrelin and obestatin prepropeptide
Prostate carcinoma	PER1	O15534	period circadian regulator 1	Transcription factor
Prostate carcinoma	PGF	P49763	placental growth factor	Signaling
Prostate carcinoma	PITX1	P78337	paired like homeodomain 1
Prostate carcinoma	PKD3		polycystic kidney disease 3 (autosomal dominant)
Prostate carcinoma	PLA2G4A	P47712	phospholipase A2 group IVA	Enzyme
Prostate carcinoma	PLAUR	Q03405	plasminogen activator, urokinase receptor
Prostate carcinoma	PLCL1	Q15111	phospholipase C like 1 (inactive)	Enzyme
Prostate carcinoma	SERPINF2	P08697	serpin family F member 2	Enzyme modulator
Prostate carcinoma	PLXNB1	O43157	plexin B1
Prostate carcinoma	PMAIP1	Q13794	phorbol-12-myristate-13-acetate-induced protein 1
Prostate carcinoma	XRN1	Q8IZH2	5'-3' exoribonuclease 1
Prostate carcinoma	UGT2B28	Q9BY64	UDP glucuronosyltransferase family 2 member B28
Prostate carcinoma	DDX56	Q9NY93	DEAD-box helicase 56
Prostate carcinoma	PPP1R12C	Q9BZL4	protein phosphatase 1 regulatory subunit 12C
Prostate carcinoma	TRIM68	Q6AZZ1	tripartite motif containing 68
Prostate carcinoma	PPP2CA	P67775	protein phosphatase 2 catalytic subunit alpha
Prostate carcinoma	MEG3		maternally expressed 3
Prostate carcinoma	H4C15	P62805	H4 clustered histone 15
Prostate carcinoma	CAMK2N1	Q7Z7J9	calcium/calmodulin dependent protein kinase II inhibitor 1
Prostate carcinoma	HES6	Q96HZ4	hes family bHLH transcription factor 6	Transcription factor
Prostate carcinoma	TRIM36	Q9NQ86	tripartite motif containing 36
Prostate carcinoma	PRG2	P13727	proteoglycan 2, pro eosinophil major basic protein	Enzyme modulator
Prostate carcinoma	PRKAR1A	P10644	protein kinase cAMP-dependent type I regulatory subunit alpha
Prostate carcinoma	MYDGF	Q969H8	myeloid derived growth factor
Prostate carcinoma	MAPK9	P45984	mitogen-activated protein kinase 9	Kinase
Prostate carcinoma	KLK6	Q92876	kallikrein related peptidase 6	Enzyme
Prostate carcinoma	B2M	P61769	beta-2-microglobulin	Immune response
Prostate carcinoma	PLAAT1	Q9HDD0	phospholipase A and acyltransferase 1
Prostate carcinoma	PSMD7	P51665	proteasome 26S subunit, non-ATPase 7	Enzyme
Prostate carcinoma	DANCR	P0C864	differentiation antagonizing non-protein coding RNA
Prostate carcinoma	MIR452		microRNA 452
Prostate carcinoma	MIR409		microRNA 409
Prostate carcinoma	MIR146B		microRNA 146b
Prostate carcinoma	MIR500A		microRNA 500a
Prostate carcinoma	GATAD2B	Q8WXI9	GATA zinc finger domain containing 2B	Nucleic acid binding
Prostate carcinoma	KIDINS220	Q9ULH0	kinase D interacting substrate 220
Prostate carcinoma	PTPN1	P18031	protein tyrosine phosphatase non-receptor type 1
Prostate carcinoma	PTPN6	P29350	protein tyrosine phosphatase non-receptor type 6
Prostate carcinoma	PTPN7	P35236	protein tyrosine phosphatase non-receptor type 7	Enzyme
Prostate carcinoma	SUGP1	Q8IWZ8	SURP and G-patch domain containing 1	Nucleic acid binding
Prostate carcinoma	HAMP	P81172	hepcidin antimicrobial peptide
Prostate carcinoma	CCDC181	Q5TID7	coiled-coil domain containing 181
Prostate carcinoma	ZNF410	Q86VK4	zinc finger protein 410	Transcription factor
Prostate carcinoma	PTPRF	P10586	protein tyrosine phosphatase receptor type F	Enzyme
Prostate carcinoma	PYCR1	P32322	pyrroline-5-carboxylate reductase 1
Prostate carcinoma	RAN	P62826	RAN, member RAS oncogene family	Enzyme modulator
Prostate carcinoma	RARA	P10276	retinoic acid receptor alpha	Nuclear receptor
Prostate carcinoma	RB1	P06400	RB transcriptional corepressor 1	Nucleic acid binding
Prostate carcinoma	PBOV1	Q9GZY1	prostate and breast cancer overexpressed 1
Prostate carcinoma	RBP1	P09455	retinol binding protein 1
Prostate carcinoma	BCL2L1	Q07817	BCL2 like 1	Signaling
Prostate carcinoma	RING1	Q06587	ring finger protein 1
Prostate carcinoma	SNORD15A		small nucleolar RNA, C/D box 15A
Prostate carcinoma	RPL19	P84098	ribosomal protein L19	Nucleic acid binding
Prostate carcinoma	MIR483		microRNA 483
Prostate carcinoma	MIR455		microRNA 455
Prostate carcinoma	RPS6KB1	P23443	ribosomal protein S6 kinase B1	Kinase
Prostate carcinoma	RRAD	P55042	RRAD, Ras related glycolysis inhibitor and calcium channel regulator
Prostate carcinoma	RREB1	Q92766	ras responsive element binding protein 1
Prostate carcinoma	RRM2	P31350	ribonucleotide reductase regulatory subunit M2	Enzyme
Prostate carcinoma	SORT1	Q99523	sortilin 1	Transporter
Prostate carcinoma	VPS52	Q8N1B4	VPS52 subunit of GARP complex	Transporter
Prostate carcinoma	TP53AIP1	Q9HCN2	tumor protein p53 regulated apoptosis inducing protein 1
Prostate carcinoma	GOLPH3	Q9H4A6	golgi phosphoprotein 3
Prostate carcinoma	SFRP5	Q5T4F7	secreted frizzled related protein 5
Prostate carcinoma	CXCR5	P32302	C-X-C motif chemokine receptor 5	G-protein coupled receptor
Prostate carcinoma	TTTY15		testis-specific transcript, Y-linked 15
Prostate carcinoma	SHH	Q15465	sonic hedgehog signaling molecule
Prostate carcinoma	SHOX2	O60902	short stature homeobox 2
Prostate carcinoma	SMYD3	Q9H7B4	SET and MYND domain containing 3	Epigenetic regulator
Prostate carcinoma	BMP1	P13497	bone morphogenetic protein 1
Prostate carcinoma	BMP4	P12644	bone morphogenetic protein 4	Signaling
Prostate carcinoma	CXADRP1		CXADR pseudogene 1
Prostate carcinoma	SLC7A1	P30825	solute carrier family 7 member 1	Transporter
Prostate carcinoma	SMARCA1	P28370	SWI/SNF related, matrix associated, actin dependent regulator of chromatin, subfamily a, member 1	Enzyme
Prostate carcinoma	FSCN1	Q16658	fascin actin-bundling protein 1	Cellular structure
Prostate carcinoma	SRM	P19623	spermidine synthase	Enzyme
Prostate carcinoma	SRPK1	Q96SB4	SRSF protein kinase 1	Kinase
Prostate carcinoma	ST13	P50502	ST13 Hsp70 interacting protein
Prostate carcinoma	STC1	P52823	stanniocalcin 1	Signaling
Prostate carcinoma	SYP	P08247	synaptophysin	Transporter
Prostate carcinoma	MAP3K7	O43318	mitogen-activated protein kinase kinase kinase 7	Kinase
Prostate carcinoma	HNF1A	P20823	HNF1 homeobox A	Nucleic acid binding
Prostate carcinoma	TCF3	P15923	transcription factor 3	Transcription factor
Prostate carcinoma	MIR574		microRNA 574
Prostate carcinoma	MIR615		microRNA 615
Prostate carcinoma	BTK	Q06187	Bruton tyrosine kinase	Kinase
Prostate carcinoma	TEAD1	P28347	TEA domain transcription factor 1	Transcription factor
Prostate carcinoma	TEK	Q02763	TEK receptor tyrosine kinase	Kinase
Prostate carcinoma	TERF2	Q15554	telomeric repeat binding factor 2
Prostate carcinoma	TFAP2A	P05549	transcription factor AP-2 alpha	Transcription factor
Prostate carcinoma	TFRC	P02786	transferrin receptor	Enzyme
Prostate carcinoma	THBS2	P35442	thrombospondin 2
Prostate carcinoma	TRAF2	Q12933	TNF receptor associated factor 2	Signaling
Prostate carcinoma	TRPM2	O94759	transient receptor potential cation channel subfamily M member 2	Ion channel
Prostate carcinoma	TRPS1	Q9UHF7	transcriptional repressor GATA binding 1
Prostate carcinoma	TXNRD1	Q16881	thioredoxin reductase 1	Enzyme
Prostate carcinoma	TYR	P14679	tyrosinase	Enzyme
Prostate carcinoma	VPS51	Q9UID3	VPS51 subunit of GARP complex
Prostate carcinoma	VCL	P18206	vinculin
Prostate carcinoma	VCP	P55072	valosin containing protein
Prostate carcinoma	EZR	P15311	ezrin	Cellular structure
Prostate carcinoma	VIPR1	P32241	vasoactive intestinal peptide receptor 1	G-protein coupled receptor
Prostate carcinoma	VTN	P04004	vitronectin
Prostate carcinoma	NSD2	O96028	nuclear receptor binding SET domain protein 2	Epigenetic regulator
Prostate carcinoma	WNT1	P04628	Wnt family member 1	Signaling
Prostate carcinoma	XRCC4	Q13426	X-ray repair cross complementing 4
Prostate carcinoma	ZNF217	O75362	zinc finger protein 217
Prostate carcinoma	PRDM2	Q13029	PR/SET domain 2
Prostate carcinoma	DDR1	Q08345	discoidin domain receptor tyrosine kinase 1	Kinase
Prostate carcinoma	FZD5	Q13467	frizzled class receptor 5	G-protein coupled receptor
Prostate carcinoma	CAD	P27708	carbamoyl-phosphate synthetase 2, aspartate transcarbamylase, and dihydroorotase	Enzyme
Prostate carcinoma	PALB2	Q86YC2	partner and localizer of BRCA2
Prostate carcinoma	CAMKMT	Q7Z624	calmodulin-lysine N-methyltransferase
Prostate carcinoma	CMIP	Q8IY22	c-Maf inducing protein	Transcription factor
Prostate carcinoma	TLR10	Q9BXR5	toll like receptor 10
Prostate carcinoma	CAPG	P40121	capping actin protein, gelsolin like	Cellular structure
Prostate carcinoma	CAPN2	P17655	calpain 2	Enzyme
Prostate carcinoma	H4C9	P62805	H4 clustered histone 9
Prostate carcinoma	AXIN2	Q9Y2T1	axin 2
Prostate carcinoma	FZD8	Q9H461	frizzled class receptor 8	G-protein coupled receptor
Prostate carcinoma	NUF2	Q9BZD4	NUF2 component of NDC80 kinetochore complex	Cellular structure
Prostate carcinoma	H4C1	P62805	H4 clustered histone 1
Prostate carcinoma	SOX7	Q9BT81	SRY-box transcription factor 7	Transcription factor
Prostate carcinoma	H4C4	P62805	H4 clustered histone 4
Prostate carcinoma	H4C6	P62805	H4 clustered histone 6
Prostate carcinoma	H4C12	P62805	H4 clustered histone 12
Prostate carcinoma	H4C11	P62805	H4 clustered histone 11
Prostate carcinoma	H4C3	P62805	H4 clustered histone 3
Prostate carcinoma	H4C8	P62805	H4 clustered histone 8
Prostate carcinoma	H4C2	P62805	H4 clustered histone 2
Prostate carcinoma	H4C5	P62805	H4 clustered histone 5
Prostate carcinoma	H4C13	P62805	H4 clustered histone 13
Prostate carcinoma	H4C14	P62805	H4 clustered histone 14
Prostate carcinoma	ITCH	Q96J02	itchy E3 ubiquitin protein ligase	Enzyme
Prostate carcinoma	PLA2G6	O60733	phospholipase A2 group VI	Enzyme modulator
Prostate carcinoma	PLA2G10	O15496	phospholipase A2 group X	Enzyme
Prostate carcinoma	BRIP1	Q9BX63	BRCA1 interacting protein C-terminal helicase 1	Enzyme
Prostate carcinoma	SPARCL1	Q14515	SPARC like 1	Signaling
Prostate carcinoma	MAGT1	Q9H0U3	magnesium transporter 1	Transporter
Prostate carcinoma	KAT8	Q9H7Z6	lysine acetyltransferase 8
Prostate carcinoma	TCHP	Q9BT92	trichoplein keratin filament binding
Prostate carcinoma	LZTS2	Q9BRK4	leucine zipper tumor suppressor 2
Prostate carcinoma	CUL4B	Q13620	cullin 4B	Enzyme
Prostate carcinoma	CUL4A	Q13619	cullin 4A	Enzyme
Prostate carcinoma	SNORD35B		small nucleolar RNA, C/D box 35B
Prostate carcinoma	IL17RC	Q8NAC3	interleukin 17 receptor C
Prostate carcinoma	ORAI1	Q96D31	ORAI calcium release-activated calcium modulator 1	Ion channel
Prostate carcinoma	SNORD14B		small nucleolar RNA, C/D box 14B
Prostate carcinoma	SNORD14C		small nucleolar RNA, C/D box 14C
Prostate carcinoma	SNORD14D		small nucleolar RNA, C/D box 14D
Prostate carcinoma	SNORD14E		small nucleolar RNA, C/D box 14E
Prostate carcinoma	ZIC5	Q96T25	Zic family member 5	Transcription factor
Prostate carcinoma	BHLHE40	O14503	basic helix-loop-helix family member e40	Transcription factor
Prostate carcinoma	HSD17B6	O14756	hydroxysteroid 17-beta dehydrogenase 6	Enzyme
Prostate carcinoma	PDE5A	O76074	phosphodiesterase 5A
Prostate carcinoma	RIPK1	Q13546	receptor interacting serine/threonine kinase 1	Kinase
Prostate carcinoma	ADAM15	Q13444	ADAM metallopeptidase domain 15	Enzyme
Prostate carcinoma	KRIT1	O00522	KRIT1 ankyrin repeat containing
Prostate carcinoma	BCL10	O95999	BCL10 immune signaling adaptor
Prostate carcinoma	WASF1	Q92558	WASP family member 1	Cellular structure
Prostate carcinoma	SPAG9	O60271	sperm associated antigen 9	Enzyme modulator
Prostate carcinoma	SLC7A7	Q9UM01	solute carrier family 7 member 7	Transporter
Prostate carcinoma	SLC7A6	Q92536	solute carrier family 7 member 6	Transporter
Prostate carcinoma	USP2	O75604	ubiquitin specific peptidase 2	Enzyme
Prostate carcinoma	CBFA2T2	O43439	CBFA2/RUNX1 partner transcriptional co-repressor 2	Transcription factor
Prostate carcinoma	EXO1	Q9UQ84	exonuclease 1	Enzyme
Prostate carcinoma	ARHGEF2	Q92974	Rho/Rac guanine nucleotide exchange factor 2
Prostate carcinoma	SLC33A1	O00400	solute carrier family 33 member 1	Transporter
Prostate carcinoma	PPIG	Q13427	peptidylprolyl isomerase G
Prostate carcinoma	COX5A	P20674	cytochrome c oxidase subunit 5A	Enzyme
Prostate carcinoma	LPXN	O60711	leupaxin	Cellular structure
Prostate carcinoma	ONECUT2	O95948	one cut homeobox 2	Transcription factor
Prostate carcinoma	CD38	P28907	CD38 molecule	Enzyme
Prostate carcinoma	PTGES	O14684	prostaglandin E synthase
Prostate carcinoma	CXCL14	O95715	C-X-C motif chemokine ligand 14
Prostate carcinoma	CD47	Q08722	CD47 molecule
Prostate carcinoma	CD59	P13987	CD59 molecule (CD59 blood group)
Prostate carcinoma	CD63	P08962	CD63 molecule
Prostate carcinoma	PCLAF	Q15004	PCNA clamp associated factor
Prostate carcinoma	MAGI2	Q86UL8	membrane associated guanylate kinase, WW and PDZ domain containing 2
Prostate carcinoma	TLK1	Q9UKI8	tousled like kinase 1	Kinase
Prostate carcinoma	G3BP2	Q9UN86	G3BP stress granule assembly factor 2	Nucleic acid binding
Prostate carcinoma	NR1I3	Q14994	nuclear receptor subfamily 1 group I member 3	Nuclear receptor
Prostate carcinoma	CDH3	P22223	cadherin 3
Prostate carcinoma	VTRNA2-1		vault RNA 2-1
Prostate carcinoma	MIR875		microRNA 875
Prostate carcinoma	MIR744		microRNA 744
Prostate carcinoma	MIR374B		microRNA 374b
Prostate carcinoma	MIR301B		microRNA 301b
Prostate carcinoma	MIR543		microRNA 543
Prostate carcinoma	LOXL1-AS1		LOXL1 antisense RNA 1
Prostate carcinoma	MIR1266		microRNA 1266
Prostate carcinoma	MIR1271		microRNA 1271
Prostate carcinoma	H3P41		H3 histone pseudogene 41
Prostate carcinoma	MIR3622A		microRNA 3622a
Prostate carcinoma	PCAT6		prostate cancer associated transcript 6
Prostate carcinoma	CCAT1		colon cancer associated transcript 1
Prostate carcinoma	MICA	Q29983	MHC class I polypeptide-related sequence A
Prostate carcinoma	DNM1L	O00429	dynamin 1 like	Enzyme modulator
Prostate carcinoma	MIR4534		microRNA 4534
Prostate carcinoma	NR1H3	Q13133	nuclear receptor subfamily 1 group H member 3	Nuclear receptor
Prostate carcinoma	TSPAN1	O60635	tetraspanin 1
Prostate carcinoma	RAD50	Q92878	RAD50 double strand break repair protein
Prostate carcinoma	KIF20A	O95235	kinesin family member 20A	Cellular structure
Prostate carcinoma	OPTN	Q96CV9	optineurin
Prostate carcinoma	G3BP1	Q13283	G3BP stress granule assembly factor 1	Nucleic acid binding
Prostate carcinoma	TRIM28	Q13263	tripartite motif containing 28
Prostate carcinoma	DHRS9	Q9BPW9	dehydrogenase/reductase 9	Enzyme
Prostate carcinoma	TRPM2-AS		TRPM2 antisense RNA
Prostate carcinoma	RNF41	Q9H4P4	ring finger protein 41
Prostate carcinoma	AK6	Q9Y3D8	adenylate kinase 6
Prostate carcinoma	CTDSPL	O15194	CTD small phosphatase like
Prostate carcinoma	RABEPK	Q7Z6M1	Rab9 effector protein with kelch motifs
Prostate carcinoma	RAMP1	O60894	receptor activity modifying protein 1	Receptor
Prostate carcinoma	STUB1	Q9UNE7	STIP1 homology and U-box containing protein 1
Prostate carcinoma	TP53COR1		tumor protein p53 pathway corepressor 1
Prostate carcinoma	MAEA	Q7L5Y9	macrophage erythroblast attacher
Prostate carcinoma	APC2	O95996	APC regulator of WNT signaling pathway 2
Prostate carcinoma	APBB3	O95704	amyloid beta precursor protein binding family B member 3
Prostate carcinoma	PCAT2		prostate cancer associated transcript 2
Prostate carcinoma	CNPY2	Q9Y2B0	canopy FGF signaling regulator 2
Prostate carcinoma	KLF2	Q9Y5W3	Kruppel like factor 2	Nucleic acid binding
Prostate carcinoma	SEMA3A	Q14563	semaphorin 3A	Signaling
Prostate carcinoma	TUBA1B	P68363	tubulin alpha 1b	Cellular structure
Prostate carcinoma	PIAS3	Q9Y6X2	protein inhibitor of activated STAT 3
Prostate carcinoma	PCAT29		prostate cancer associated transcript 29
Prostate carcinoma	ECI2	O75521	enoyl-CoA delta isomerase 2	Enzyme modulator
Prostate carcinoma	CLEC10A	Q8IUN9	C-type lectin domain containing 10A	Receptor
Prostate carcinoma	SEC23A	Q15436	Sec23 homolog A, COPII coat complex component	Enzyme modulator
Prostate carcinoma	CEBPA	P49715	CCAAT enhancer binding protein alpha	Transcription factor
Prostate carcinoma	MYBBP1A	Q9BQG0	MYB binding protein 1a	Enzyme
Prostate carcinoma	CEBPD	P49716	CCAAT enhancer binding protein delta	Transcription factor
Prostate carcinoma	ATG7	O95352	autophagy related 7	Enzyme
Prostate carcinoma	PCSEAT		prostate cancer expressed EZH2 associated transcript
Prostate carcinoma	PRDX4	Q13162	peroxiredoxin 4	Enzyme
Prostate carcinoma	PAICS	P22234	phosphoribosylaminoimidazole carboxylase and phosphoribosylaminoimidazolesuccinocarboxamide synthase	Enzyme
Prostate carcinoma	HEXIM1	O94992	HEXIM P-TEFb complex subunit 1
Prostate carcinoma	NPRL2	Q8WTW4	NPR2 like, GATOR1 complex subunit	Enzyme
Prostate carcinoma	CETN1	Q12798	centrin 1	Calcium-binding protein
Prostate carcinoma	KDM5B	Q9UGL1	lysine demethylase 5B	Epigenetic regulator
Prostate carcinoma	IQGAP2	Q13576	IQ motif containing GTPase activating protein 2	Enzyme modulator
Prostate carcinoma	SEPTIN9	Q9UHD8	septin 9	Enzyme modulator
Prostate carcinoma	CCR9	P51686	C-C motif chemokine receptor 9	G-protein coupled receptor
Prostate carcinoma	CGA	P01215	glycoprotein hormones, alpha polypeptide
Prostate carcinoma	WASF3	Q9UPY6	WASP family member 3	Cellular structure
Prostate carcinoma	NEU3	Q9UQ49	neuraminidase 3	Enzyme
Prostate carcinoma	PPP1R13L	Q8WUF5	protein phosphatase 1 regulatory subunit 13 like
Prostate carcinoma	BTG3	Q14201	BTG anti-proliferation factor 3
Prostate carcinoma	SNORD138		small nucleolar RNA, C/D box 138
Prostate carcinoma	STIP1	P31948	stress induced phosphoprotein 1
Prostate carcinoma	EBNA1BP2	Q99848	EBNA1 binding protein 2
Prostate carcinoma	IMMT	Q16891	inner membrane mitochondrial protein
Prostate carcinoma	TMSB15A	P0CG34;P0CG35	thymosin beta 15a
Prostate carcinoma	LOC110351180		IBSP 5' regulatory region
Prostate carcinoma	MNS16A		MNS16A minisatellite promoter
Prostate carcinoma	ESM1	Q9NQ30	endothelial cell specific molecule 1
Prostate carcinoma	CHEK1	O14757	checkpoint kinase 1	Kinase
Prostate carcinoma	PTPRT	O14522	protein tyrosine phosphatase receptor type T	Enzyme
Prostate carcinoma	LZTS1	Q9Y250	leucine zipper tumor suppressor 1
Prostate carcinoma	PTENP1		phosphatase and tensin homolog pseudogene 1
Prostate carcinoma	CHRM1	P11229	cholinergic receptor muscarinic 1	G-protein coupled receptor
Prostate carcinoma	STK38	Q15208	serine/threonine kinase 38	Kinase
Prostate carcinoma	ACOT7	O00154	acyl-CoA thioesterase 7	Enzyme
Prostate carcinoma	MGLL	Q99685	monoglyceride lipase	Enzyme
Prostate carcinoma	H3P28		H3 histone pseudogene 28
Prostate carcinoma	H3P40		H3 histone pseudogene 40
Prostate carcinoma	WDFY2	Q96P53	WD repeat and FYVE domain containing 2
Prostate carcinoma	BATF2	Q8N1L9	basic leucine zipper ATF-like transcription factor 2	Transcription factor
Prostate carcinoma	ANIB1		aneurysm, intracranial berry 1
Prostate carcinoma	ADCYAP1R1	P41586	ADCYAP receptor type I	G-protein coupled receptor
Prostate carcinoma	TWIST2	Q8WVJ9	twist family bHLH transcription factor 2	Transcription factor
Prostate carcinoma	LARGE2	Q8N3Y3	LARGE xylosyl- and glucuronyltransferase 2	Enzyme
Prostate carcinoma	CMA1	P23946	chymase 1	Enzyme
Prostate carcinoma	CANT1	Q8WVQ1	calcium activated nucleotidase 1
Prostate carcinoma	PLK3	Q9H4B4	polo like kinase 3	Kinase
Prostate carcinoma	COMP	P49747	cartilage oligomeric matrix protein
Prostate carcinoma	EMB	Q6PCB8	embigin	Receptor
Prostate carcinoma	VPS37A	Q8NEZ2	VPS37A subunit of ESCRT-I
Prostate carcinoma	CRMP1	Q14194	collapsin response mediator protein 1	Enzyme
Prostate carcinoma	CRY1	Q16526	cryptochrome circadian regulator 1	Enzyme
Prostate carcinoma	CRY2	Q49AN0	cryptochrome circadian regulator 2	Enzyme
Prostate carcinoma	CRYGD	P07320	crystallin gamma D
Prostate carcinoma	CRYZ	Q08257	crystallin zeta
Prostate carcinoma	CSF1	P09603	colony stimulating factor 1
Prostate carcinoma	CSH1	P0DML2;P0DML3	chorionic somatomammotropin hormone 1	Signaling
Prostate carcinoma	CSH2	P0DML2;P0DML3	chorionic somatomammotropin hormone 2	Signaling
Prostate carcinoma	CSNK1E	P49674	casein kinase 1 epsilon
Prostate carcinoma	CSNK2A2	P19784	casein kinase 2 alpha 2	Kinase
Prostate carcinoma	NRG4	Q8WWG1	neuregulin 4	Signaling
Prostate carcinoma	CSRP1	P21291	cysteine and glycine rich protein 1	Cellular structure
Prostate carcinoma	LYPD4	Q6UWN0	LY6/PLAUR domain containing 4
Prostate carcinoma	CREB3L4	Q8TEY5	cAMP responsive element binding protein 3 like 4
Prostate carcinoma	CCN2	P29279	cellular communication network factor 2	Signaling
Prostate carcinoma	CTSL	P07711	cathepsin L	Enzyme
Prostate carcinoma	CUX1	P39880;Q13948	cut like homeobox 1	Transcription factor
Prostate carcinoma	CX3CR1	P49238	C-X3-C motif chemokine receptor 1	G-protein coupled receptor
Prostate carcinoma	PAQR3	Q6TCH7	progestin and adipoQ receptor family member 3	Receptor
Prostate carcinoma	KLB	Q86Z14	klotho beta	Enzyme
Prostate carcinoma	AGR3	Q8TD06	anterior gradient 3, protein disulphide isomerase family member	Enzyme
Prostate carcinoma	GRK3	P35626	G protein-coupled receptor kinase 3	Kinase
Prostate carcinoma	LRATD2	Q96KN1	LRAT domain containing 2
Prostate carcinoma	MAGEB6	Q8N7X4	MAGE family member B6	Cell adhesion
Prostate carcinoma	SLC5A8	Q8N695	solute carrier family 5 member 8	Transporter
Prostate carcinoma	DAPK3	O43293	death associated protein kinase 3	Kinase
Prostate carcinoma	TMPRSS6	Q8IU80	transmembrane serine protease 6	Enzyme
Prostate carcinoma	DHX15	O43143	DEAH-box helicase 15	Enzyme
Prostate carcinoma	ZNF92	Q03936	zinc finger protein 92
Prostate carcinoma	DKC1	O60832	dyskerin pseudouridine synthase 1	Nucleic acid binding
Prostate carcinoma	AFP	P02771	alpha fetoprotein	Transporter
Prostate carcinoma	DMBT1	Q9UGM3	deleted in malignant brain tumors 1	Enzyme
Prostate carcinoma	SARDH	Q9UL12	sarcosine dehydrogenase	Enzyme
Prostate carcinoma	DNMT3A	Q9Y6K1	DNA methyltransferase 3 alpha
Prostate carcinoma	DNTT	P04053	DNA nucleotidylexotransferase	Enzyme
Prostate carcinoma	DRD2	P14416	dopamine receptor D2	G-protein coupled receptor
Prostate carcinoma	DSG2	Q14126	desmoglein 2	Cell adhesion
Prostate carcinoma	HBEGF	Q99075	heparin binding EGF like growth factor	Signaling
Prostate carcinoma	DUSP2	Q05923	dual specificity phosphatase 2
Prostate carcinoma	DVL3	Q92997	dishevelled segment polarity protein 3	Signaling
Prostate carcinoma	AGTR2	P50052	angiotensin II receptor type 2	G-protein coupled receptor
Prostate carcinoma	E2F4	Q16254	E2F transcription factor 4	Nucleic acid binding
Prostate carcinoma	EEF1B2P2		eukaryotic translation elongation factor 1 beta 2 pseudogene 2
Prostate carcinoma	EGR3	Q06889	early growth response 3	Nucleic acid binding
Prostate carcinoma	EPHA2	P29317	EPH receptor A2	Kinase
Prostate carcinoma	SERPINB1	P30740	serpin family B member 1	Enzyme modulator
Prostate carcinoma	MARK2	Q7KZI7	microtubule affinity regulating kinase 2	Kinase
Prostate carcinoma	EMP1	P54849	epithelial membrane protein 1	Cellular structure
Prostate carcinoma	CTTN	Q14247	cortactin	Cellular structure
Prostate carcinoma	ENO1	P06733	enolase 1	Enzyme
Prostate carcinoma	EP300	Q09472	E1A binding protein p300
Prostate carcinoma	EPHA7	Q15375	EPH receptor A7	Kinase
Prostate carcinoma	ERBB4	Q15303	erb-b2 receptor tyrosine kinase 4	Kinase
Prostate carcinoma	ERCC6	P0DP91;Q03468	ERCC excision repair 6, chromatin remodeling factor
Prostate carcinoma	ESRRG	P62508	estrogen related receptor gamma	Nuclear receptor
Prostate carcinoma	EVX1	P49640	even-skipped homeobox 1
Prostate carcinoma	EWSR1	Q01844	EWS RNA binding protein 1	Nucleic acid binding
Prostate carcinoma	F13A1	P00488	coagulation factor XIII A chain	Enzyme
Prostate carcinoma	ACSL4	O60488	acyl-CoA synthetase long chain family member 4	Enzyme
Prostate carcinoma	FBLN1	P23142	fibulin 1
Prostate carcinoma	USP12	O75317	ubiquitin specific peptidase 12	Enzyme
Prostate carcinoma	MED19	A0JLT2	mediator complex subunit 19
Prostate carcinoma	VWCE	Q96DN2	von Willebrand factor C and EGF domains
Prostate carcinoma	HEPACAM	Q14CZ8	hepatic and glial cell adhesion molecule
Prostate carcinoma	ZUP1	Q96AP4	zinc finger containing ubiquitin peptidase 1
Prostate carcinoma	FCGR3A	P08637	Fc fragment of IgG receptor IIIa	Cell adhesion
Prostate carcinoma	FOXK1	P85037	forkhead box K1
Prostate carcinoma	FECH	P22830	ferrochelatase	Enzyme
Prostate carcinoma	FGF9	P31371	fibroblast growth factor 9	Signaling
Prostate carcinoma	FH	P07954	fumarate hydratase	Enzyme
Prostate carcinoma	VASH1	Q7L8A9	vasohibin 1
Prostate carcinoma	MLXIP	Q9HAP2	MLX interacting protein
Prostate carcinoma	ATF6	P18850	activating transcription factor 6
Prostate carcinoma	RAB3GAP1	Q15042	RAB3 GTPase activating protein catalytic subunit 1
Prostate carcinoma	CDK19	Q9BWU1	cyclin dependent kinase 19	Kinase
Prostate carcinoma	SARM1	Q6SZW1	sterile alpha and TIR motif containing 1
Prostate carcinoma	KDM6B	O15054	lysine demethylase 6B	Epigenetic regulator
Prostate carcinoma	FLII	Q13045	FLII actin remodeling protein
Prostate carcinoma	FLNC	Q14315	filamin C
Prostate carcinoma	ATG4B	Q9Y4P1	autophagy related 4B cysteine peptidase	Enzyme
Prostate carcinoma	NBEAL2	Q6ZNJ1	neurobeachin like 2
Prostate carcinoma	WWC1	Q8IX03	WW and C2 domain containing 1
Prostate carcinoma	FMOD	Q06828	fibromodulin
Prostate carcinoma	SIRT3	Q9NTG7	sirtuin 3	Epigenetic regulator
Prostate carcinoma	ANGPTL2	Q9UKU9	angiopoietin like 2	Signaling
Prostate carcinoma	HEY1	Q9Y5J3	hes related family bHLH transcription factor with YRPW motif 1	Transcription factor
Prostate carcinoma	CBX7	O95931	chromobox 7	Epigenetic regulator
Prostate carcinoma	TRIM29	Q14134	tripartite motif containing 29
Prostate carcinoma	GABARAPL1	Q9H0R8	GABA type A receptor associated protein like 1	Cellular structure
Prostate carcinoma	IL17RA	Q96F46	interleukin 17 receptor A
Prostate carcinoma	KIF4A	O95239	kinesin family member 4A	Cellular structure
Prostate carcinoma	IFIT5	Q13325	interferon induced protein with tetratricopeptide repeats 5
Prostate carcinoma	FRA7G		fragile site, aphidicolin type, common, fra(7)(q31.2)
Prostate carcinoma	FRK	P42685	fyn related Src family tyrosine kinase	Kinase
Prostate carcinoma	ABL1	P00519	ABL proto-oncogene 1, non-receptor tyrosine kinase	Kinase
Prostate carcinoma	FTL	P02792	ferritin light chain	Storage
Prostate carcinoma	FUT1	P19526	fucosyltransferase 1 (H blood group)	Enzyme
Prostate carcinoma	FUT8	Q9BYC5	fucosyltransferase 8
Prostate carcinoma	RASGRP3	Q8IV61	RAS guanyl releasing protein 3	Enzyme modulator
Prostate carcinoma	ASPM	Q8IZT6	abnormal spindle microtubule assembly
Prostate carcinoma	WWTR1	Q9GZV5	WW domain containing transcription regulator 1	Enzyme modulator
Prostate carcinoma	LRIG1	Q96JA1	leucine rich repeats and immunoglobulin like domains 1	Receptor
Prostate carcinoma	GLCE	O94923	glucuronic acid epimerase
Prostate carcinoma	APPL1	Q9UKG1	adaptor protein, phosphotyrosine interacting with PH domain and leucine zipper 1
Prostate carcinoma	AMD1	P17707	adenosylmethionine decarboxylase 1	Enzyme
Prostate carcinoma	GATA1	P15976	GATA binding protein 1
Prostate carcinoma	FBXO8	Q9NRD0	F-box protein 8
Prostate carcinoma	ARFGAP3	Q9NP61	ADP ribosylation factor GTPase activating protein 3
Prostate carcinoma	HSPB8	Q9UJY1	heat shock protein family B (small) member 8
Prostate carcinoma	NUPR1	O60356	nuclear protein 1, transcriptional regulator
Prostate carcinoma	NR6A1	Q15406	nuclear receptor subfamily 6 group A member 1	Nuclear receptor
Prostate carcinoma	GCNT1	Q02742	glucosaminyl (N-acetyl) transferase 1
Prostate carcinoma	INTS6	Q9UL03	integrator complex subunit 6	Enzyme
Prostate carcinoma	GDF9	O60383	growth differentiation factor 9	Signaling
Prostate carcinoma	GEM	P55040	GTP binding protein overexpressed in skeletal muscle
Prostate carcinoma	AMH	P03971	anti-Mullerian hormone
Prostate carcinoma	GHRHR	Q02643	growth hormone releasing hormone receptor	G-protein coupled receptor
Prostate carcinoma	HBP1	O60381	HMG-box transcription factor 1
Prostate carcinoma	PABPC1	P11940	poly(A) binding protein cytoplasmic 1
Prostate carcinoma	SIGLEC7	Q9Y286	sialic acid binding Ig like lectin 7	Receptor
Prostate carcinoma	SND1	Q7KZF4	staphylococcal nuclease and tudor domain containing 1	Transcription factor
Prostate carcinoma	GJB2	P29033	gap junction protein beta 2	Cell-cell junction
Prostate carcinoma	TSPAN13	O95857	tetraspanin 13
Prostate carcinoma	BBC3	Q96PG8;Q9BXH1	BCL2 binding component 3
Prostate carcinoma	SRPX2	O60687	sushi repeat containing protein X-linked 2
Prostate carcinoma	GCLC	P48506	glutamate-cysteine ligase catalytic subunit	Enzyme
Prostate carcinoma	RABGEF1	Q9UJ41	RAB guanine nucleotide exchange factor 1	Enzyme modulator
Prostate carcinoma	MCAT	Q8IVS2	malonyl-CoA-acyl carrier protein transacylase
Prostate carcinoma	GLI2	P10070	GLI family zinc finger 2
Prostate carcinoma	GLP1R	P43220	glucagon like peptide 1 receptor	G-protein coupled receptor
Prostate carcinoma	GLUL	P15104	glutamate-ammonia ligase	Enzyme
Prostate carcinoma	GNRH2	O43555	gonadotropin releasing hormone 2
Prostate carcinoma	GPLD1	P80108	glycosylphosphatidylinositol specific phospholipase D1
Prostate carcinoma	H19		H19 imprinted maternally expressed transcript
Prostate carcinoma	HMGN2P46	Q86SG4	high mobility group nucleosomal binding domain 2 pseudogene 46	Nucleic acid binding
Prostate carcinoma	TMSB15B	P0CG34;P0CG35	thymosin beta 15B
Prostate carcinoma	GPX2	P18283	glutathione peroxidase 2	Enzyme
Prostate carcinoma	GPX4	P36969	glutathione peroxidase 4	Enzyme
Prostate carcinoma	GRB10	Q13322	growth factor receptor bound protein 10	Receptor
Prostate carcinoma	MCTS1	Q9ULC4	MCTS1 re-initiation and release factor	Receptor
Prostate carcinoma	ATAD2	Q6PL18	ATPase family AAA domain containing 2	Epigenetic regulator
Prostate carcinoma	UBE2T	Q9NPD8	ubiquitin conjugating enzyme E2 T
Prostate carcinoma	GRM1	Q13255	glutamate metabotropic receptor 1	G-protein coupled receptor
Prostate carcinoma	CXCL3	P19876	C-X-C motif chemokine ligand 3	Signaling
Prostate carcinoma	PDIA3	P30101	protein disulfide isomerase family A member 3
Prostate carcinoma	GUSB	P08236	glucuronidase beta
Prostate carcinoma	OBP2A	Q9NY56	odorant binding protein 2A	Enzyme
Prostate carcinoma	SPANXA1	Q9NS26	sperm protein associated with the nucleus, X-linked, family member A1
Prostate carcinoma	GZMB	P10144	granzyme B	Enzyme
Prostate carcinoma	HAGH	Q16775	hydroxyacylglutathione hydrolase
Prostate carcinoma	HADHA	P40939	hydroxyacyl-CoA dehydrogenase trifunctional multienzyme complex subunit alpha	Enzyme
Prostate carcinoma	HCLS1	P14317	hematopoietic cell-specific Lyn substrate 1	Cellular structure
Prostate carcinoma	HCRT	O43612	hypocretin neuropeptide precursor
Prostate carcinoma	CFHR1	Q03591	complement factor H related 1
Prostate carcinoma	HGFAC	Q04756	HGF activator	Enzyme
Prostate carcinoma	HIP1	O00291	huntingtin interacting protein 1	Cellular structure
Prostate carcinoma	MNX1	P50219	motor neuron and pancreas homeobox 1	Transcription factor
Prostate carcinoma	HMGB2	P26583	high mobility group box 2	Nucleic acid binding
Prostate carcinoma	HMGCS2	P54868	3-hydroxy-3-methylglutaryl-CoA synthase 2
Prostate carcinoma	APAF1	O14727	apoptotic peptidase activating factor 1
Prostate carcinoma	HNRNPA1	P09651	heterogeneous nuclear ribonucleoprotein A1
Prostate carcinoma	HNRNPL	P14866	heterogeneous nuclear ribonucleoprotein L
Prostate carcinoma	HPR	P00739	haptoglobin-related protein	Enzyme
Prostate carcinoma	HRAS	P01112	HRas proto-oncogene, GTPase	Enzyme modulator
Prostate carcinoma	AGFG1	P52594	ArfGAP with FG repeats 1
Prostate carcinoma	HSD17B1	P14061	hydroxysteroid 17-beta dehydrogenase 1	Enzyme
Prostate carcinoma	HSD17B4	P51659	hydroxysteroid 17-beta dehydrogenase 4
Prostate carcinoma	HSPA1A	P0DMV8;P0DMV9	heat shock protein family A (Hsp70) member 1A
Prostate carcinoma	HSPA1B	P0DMV8;P0DMV9	heat shock protein family A (Hsp70) member 1B
Prostate carcinoma	HSPA1L	P34931	heat shock protein family A (Hsp70) member 1 like
Prostate carcinoma	HSPA8	P11142	heat shock protein family A (Hsp70) member 8
Prostate carcinoma	IARS1	P41252	isoleucyl-tRNA synthetase 1	Enzyme
Prostate carcinoma	FFAR4	Q5NUL3	free fatty acid receptor 4
Prostate carcinoma	ARMH1	Q6PIY5	armadillo like helical domain containing 1
Prostate carcinoma	IFI16	Q16666	interferon gamma inducible protein 16	Transcription factor
Prostate carcinoma	ACTBL2	Q562R1	actin beta like 2
Prostate carcinoma	IGFBP5	P24593	insulin like growth factor binding protein 5	Enzyme modulator
Prostate carcinoma	IGHG1	P01857	immunoglobulin heavy constant gamma 1 (G1m marker)
Prostate carcinoma	APP	P05067	amyloid beta precursor protein	Enzyme modulator
Prostate carcinoma	RBPJ	Q06330	recombination signal binding protein for immunoglobulin kappa J region	Nucleic acid binding
Prostate carcinoma	IKBKB	O14920	inhibitor of nuclear factor kappa B kinase subunit beta	Kinase
Prostate carcinoma	IL1RN	P18510	interleukin 1 receptor antagonist
Prostate carcinoma	IL4R	P24394	interleukin 4 receptor	Receptor
Prostate carcinoma	IL5	P05113	interleukin 5
Prostate carcinoma	CXCR1	P25024	C-X-C motif chemokine receptor 1	G-protein coupled receptor
Prostate carcinoma	IL9	P15248	interleukin 9
Prostate carcinoma	AQP1	P29972	aquaporin 1 (Colton blood group)	Ion channel
Prostate carcinoma	IL11RA	Q14626	interleukin 11 receptor subunit alpha	Signaling
Prostate carcinoma	IL12A	P29459	interleukin 12A
Prostate carcinoma	IL13RA2	Q14627	interleukin 13 receptor subunit alpha 2	Signaling
Prostate carcinoma	PRAC2	D3DTV9	PRAC2 small nuclear protein
Prostate carcinoma	AQP5	P55064	aquaporin 5	Ion channel
Prostate carcinoma	ING1	Q9UK53	inhibitor of growth family member 1	Nucleic acid binding
Prostate carcinoma	INSRR	P14616	insulin receptor related receptor	Kinase
Prostate carcinoma	AQP9	O43315	aquaporin 9	Ion channel
Prostate carcinoma	IRF6	O14896	interferon regulatory factor 6	Transcription factor
Prostate carcinoma	ITGA2	P17301	integrin subunit alpha 2
Prostate carcinoma	ITGA3	P26006	integrin subunit alpha 3
Prostate carcinoma	ITGA9	Q13797	integrin subunit alpha 9
Prostate carcinoma	ITGAM	P11215	integrin subunit alpha M
Prostate carcinoma	ITPR1	Q14643	inositol 1,4,5-trisphosphate receptor type 1	Ion channel
Prostate carcinoma	ITPR3	Q14573	inositol 1,4,5-trisphosphate receptor type 3	Ion channel
Prostate carcinoma	JAK1	P23458	Janus kinase 1	Kinase
Prostate carcinoma	TRIM23	P36406	tripartite motif containing 23
Prostate carcinoma	AREG	P15514	amphiregulin	Signaling
Prostate carcinoma	KCNK2	O95069	potassium two pore domain channel subfamily K member 2	Ion channel
Prostate carcinoma	KIF2A	O00139	kinesin family member 2A	Cellular structure
Prostate carcinoma	KIFC1	Q9BW19	kinesin family member C1	Cellular structure
Prostate carcinoma	ARG2	P78540	arginase 2	Enzyme
Prostate carcinoma	KRT13	P13646	keratin 13
Prostate carcinoma	SAP30L-AS1		SAP30L antisense RNA 1 (head to head)
Prostate carcinoma	RHOA	P61586	ras homolog family member A	Enzyme modulator
Prostate carcinoma	NANOGP8	Q6NSW7	Nanog homeobox retrogene P8
Prostate carcinoma	VGLL3	A8MV65	vestigial like family member 3
Prostate carcinoma	LIN28B	Q6ZN17	lin-28 homolog B
Prostate carcinoma	LAMB3	Q13751	laminin subunit beta 3	Enzyme modulator
Prostate carcinoma	LAMC1	P11047	laminin subunit gamma 1	Enzyme modulator
Prostate carcinoma	LAMP1	P11279	lysosomal associated membrane protein 1	Transporter
Prostate carcinoma	LBR	Q14739	lamin B receptor	Enzyme
Prostate carcinoma	LCK	P06239	LCK proto-oncogene, Src family tyrosine kinase	Kinase
Prostate carcinoma	LDHB	P07195	lactate dehydrogenase B	Enzyme
Prostate carcinoma	LDLR	P01130	low density lipoprotein receptor
Prostate carcinoma	LIF	P15018	LIF interleukin 6 family cytokine	Signaling
Prostate carcinoma	LOXL2	Q9Y4K0	lysyl oxidase like 2
Prostate carcinoma	CYP4F3	Q08477	cytochrome P450 family 4 subfamily F member 3	Enzyme
Prostate carcinoma	ARNTL	O00327	aryl hydrocarbon receptor nuclear translocator like	Transcription factor
Prostate carcinoma	MIR106B		microRNA 106b
Prostate carcinoma	MIR122		microRNA 122
Prostate carcinoma	MIR140		microRNA 140
Prostate carcinoma	MIR144		microRNA 144
Prostate carcinoma	MIR15B		microRNA 15b
Prostate carcinoma	MIR18A		microRNA 18a
Prostate carcinoma	MIR187		microRNA 187
Prostate carcinoma	MIR25		microRNA 25
Prostate carcinoma	MIR28		microRNA 28
Prostate carcinoma	MIR296		microRNA 296
Prostate carcinoma	MIR29C		microRNA 29c
Prostate carcinoma	MIR302A		microRNA 302a
[truncated: 15,067 more rows]
